# Supplementary material for: Characteristics and risk factors of infections in patients with HBV-related acute-on-chronic liver failure: a retrospective study
Source: PeerJ. 2022 Jul 5;10:e13519. doi: 10.7717/peerj.13519 (PMC9266584; doi:10.7717/peerj.13519)
Supplement: Supplemental Information 1 [file peerj-10-13519-s001.xlsx]

## Sheet: Sheet1
ID	time	DNA of hepatitis B	DNA of hepatitis B	HBV-DNA (lg copies/ml)	Admission reason	MELD score	TBIL	eGFR	Scr	INR	ALT	AST	DBIL	ALB	globulin	TC	TG	BUN	UA	HCO3-	WBC	Hb	PLT	PTA	HE gardig	O2	mechanical ventilation	circulation	smoking	alcohol	gender	age	BMI	course of hepatitis B	diuretic	quantity of diuretic	frequency of diuretic	infections	hepatic encephalopathy	hepatorenal syndrome	cirrhosis	stay in bed	quantity of antibiotic	time of antibiotic	HbeAg	Artificial liver	dialysis	ACLF grading	Outcome
1001250614	0	170000000	2	8.23045	Virus replication	22	126.2	127.44	67	1.97	305	193	101.8	36.5	29.5	5.04	2.01	3.17	194.9	27.9	5.75	157	138	40	0	0	0	0	1	0	1	44	21.7993	11	0	0	0	0	0	0	0	1	0	0	1	1	0	1	Better discharge
1002219963	0	30400000	2	7.48287	Jaundice	24	211.2	119.546	74	2	1932	1276	167.3	37	23.8	3.21	1.26	2.9	240	24.8	6.68	143	147	40	0	0	0	0	1	1	1	36	27.6817	15	0	0	0	0	0	0	0	0	0	0	1	0	0	1	Better discharge
1002991031	0	25400000	2	7.40483	Jaundice	23	177.5	127.44	67	2.01	913	1234	130.6	35.2	36	3.71	2.15	4.03	264.3	26.7	5.96	140	166	40	0	0	0	0	1	0	1	44	24.9135	22	0	0	0	0	0	0	0	0	0	0	0	1	0	1	Better discharge
1004511141	0	146000000	2	8.16435	Virus replication	20	86.5	132.217	73	1.96	2320	1188	62.9	36.7	26	1.9	1.02	3.5	276.2	21.8	6.13	129	146	40	0	0	0	0	1	1	1	24	19.7232	21	0	0	0	0	0	0	0	0	0	0	1	0	0	1	Better discharge
1004553931	0	13200	1	4.12057	Jaundice	25	271	121.687	51	2.01	103	98	201.9	29.2	33.4	2.17	1.27	3.95	201.5	20.4	5.88	90	172	40	0	0	0	0	0	0	1	47	22.4913	12	0	0	0	0	0	0	1	0	0	0	1	0	0	1	Automatic discharge
1005222429	0	1050	0	3.02119	Jaundice	25	293.7	142.815	65	2.01	424	89	229.9	32.9	30.6	2.87	1.84	3.34	145.7	23.7	9.56	143	207	40	0	0	0	0	1	0	1	33	21.7993	10	0	0	0	0	0	0	0	0	0	0	1	0	0	1	Better discharge
1005599028	0	500	0	2.69897	Jaundice	23	153.7	80.3991	92	1.98	69	62	113.7	31.6	24.8	2.08	0.83	5.5	188	21.3	4.95	116	90	40	0	0	0	0	0	1	1	55	28.3737	21	1	2	2	0	0	0	1	0	0	0	0	0	0	1	Better discharge
1005744968	0	43800000	2	7.64147	Ascites	14	16.9	106.044	78	1.97	154	69	7.2	33.3	30.6	3.58	2.74	5.1	263	24	6.05	141	196	40	0	0	0	0	1	0	1	44	25.0865	21	0	0	0	0	0	0	0	0	0	0	1	0	0	1	Better discharge
1005771482	0	799	0	2.90255	Jaundice	23	208	89.1141	88	1.97	263	114	166.3	33.2	31.2	2.28	1.21	4.29	76	27.3	3.62	116	66	40	0	0	0	0	1	1	1	48	25.2595	30	1	2	3	0	0	0	0	0	0	0	0	0	0	1	Better discharge
1005967001	0	191000000	2	8.28103	Virus replication	24	240.3	149.22	46	1.95	199	237	196.2	30.9	31.6	7.69	3.52	4.05	198.8	24.9	5.88	123	234	40	0	0	0	0	0	0	1	24	23.1834	0.5	0	0	0	0	0	0	0	1	0	0	1	0	0	1	Death
1006045968	0	121000	1	5.08279	Jaundice	25	283.2	116.275	61	1.97	152	87	223.4	33.4	24.9	3.16	1.95	5.6	255	21.5	7.02	120	154	40	0	0	0	0	0	0	1	43	23.8754	0.6	0	0	0	0	0	0	0	0	0	0	1	0	0	1	Automatic discharge
1006079935	0	123000	1	5.08991	Jaundice	23	179.5	123.292	46	1.98	547	126	145.5	33.5	29.8	2.28	1.11	1.15	170.9	24.1	3.17	128	153	40	0	0	0	0	0	0	0	36	17.1468	0.6	0	0	0	0	0	0	0	0	0	0	0	0	0	1	Automatic discharge
1006475659	0	1760000	1	6.24551	Jaundice	26	383.7	104.812	53	1.99	749	728	287.8	30.7	25.1	2.66	1.47	5.1	135	29.3	2.9	113	58	39	0	0	0	0	1	1	1	66	18.6851	0.5	0	0	0	0	0	0	0	0	0	0	1	0	0	1	Automatic discharge
1004272968	1	119000000	2	8.07555	Virus replication	21	108.2	118.811	71	1.98	260	190	78.5	34.2	30.1	2.36	1.04	3.64	184.3	22.9	3	139	93	40	0	0	0	0	1	0	1	44	28.3737	2	0	0	0	0	0	0	0	0	1	2	1	0	0	1	Automatic discharge
1004880269	1	770	0	2.88649	HE	27	368.2	128.126	49	2.31	263	140	209.2	35.1	18.4	2.94	0.74	2.67	76.3	20.9	18.85	113	157	35	4	1	0	0	0	0	1	42	22.8374	10	0	0	0	0	1	0	0	1	1	1	1	0	0	3	Coma
1004885884	2	119000	1	5.07555	HE	39	322	51.9633	132	4.68	1169	496	135.3	37	14.5	2.44	1.26	4.46	125.9	21	9.4	102	86	17	4	1	0	0	0	0	1	55	23.5294	11	0	0	0	0	1	0	0	0	1	1	0	0	0	3	Coma
1003944573	3	500	0	2.69897	Jaundice	31	429.2	127.384	69	2.99	513	116	295.7	30.9	23.7	1.24	0.76	4.72	53.8	14.7	8.32	149	121	26	4	1	0	0	1	1	1	39	23.1834	4	0	0	0	0	1	0	0	0	1	1	0	0	0	3	Coma
1004059533	3	94800000	2	7.97681	Jaundice	26	450.1	126.473	57	1.99	763	198	296.9	28.3	30.7	1.45	0.84	2.62	44.8	29.1	11.28	136	241	40	2	0	0	1	0	0	1	35	22.1453	17	0	0	0	0	1	0	0	1	2	1	0	0	0	2	Automatic discharge
1004727341	3	540000000	2	8.73239	Virus replication	38	455.7	166.004	27	5.67	2069	1013	281.1	31.6	15.2	1.77	0.96	1.79	42.9	25.7	8.81	126	89	14	4	0	0	0	0	0	1	40	23.1834	6.5	0	0	0	0	1	0	0	1	1	1	0	0	0	3	Coma
2001116679	3	956000	1	5.98046	Jaundice	30	339.2	132.319	62	3.02	413	275	245.3	21.2	55.8	1.63	0.85	4.02	105.5	24.8	9.49	117	141	26	0	0	0	0	1	0	1	52	23.5294	0.5	1	2	3	0	0	0	0	0	1	1	0	0	0	2	Automatic discharge
1004094437	4	1000000	1	6	HE	37	260.1	132.848	57	6.02	594	505	111.4	28.3	30.8	1.52	0.68	1.55	123.3	25.4	4.14	118	96	14	4	1	1	0	0	0	1	28	21.4533	21	0	0	0	0	1	0	0	0	1	1	0	0	0	3	Automatic discharge
1005346618	4	1570	1	3.1959	Jaundice	25	282	110.657	59	1.97	205	222	224.3	38.7	29.3	3.43	2.72	5.68	234.3	24	5.32	118	187	40	0	0	0	0	1	1	1	52	17.301	0.5	1	2	1	0	0	0	0	1	1	1	0	0	0	1	Automatic discharge
1005831429	4	47200	1	4.67394	Jaundice	25	239.6	125.571	74	2.1	438	86	183.5	37	3.53	2.86	1.17	3.41	232.5	23.6	7.64	136	255	39	0	0	0	0	0	0	1	29	26.2976	10	0	0	0	0	0	0	0	0	1	1	0	0	0	1	Automatic discharge
1006153925	4	5450	1	3.7364	Jaundice	23	123.8	174.371	27	2.2	26	53	53.4	36.9	38.6	2.86	1.29	2.93	115.1	25.4	1.56	109	37	35	0	0	0	0	0	0	1	33	22.1453	12	0	0	0	0	0	0	1	1	1	1	0	0	0	1	Better discharge
1006186174	4	185000000	2	8.26717	HE	33	300.2	118.202	52	4.18	886	1357	201	32.4	25.8	1.46	0.75	3.73	119	24.8	7.09	144	63	18	4	1	0	0	1	1	1	50	23.8754	20	1	2	3	0	1	0	0	0	1	1	1	1	0	3	Coma
902849	5	1480000	1	6.17026	Jaundice	30	254.5	124.952	41	3.22	559	679	184.4	31.7	24.1	2.24	0.84	2.49	96	25.4	6.62	149	70	24	1	0	0	0	1	1	1	56	20.7612	11	1	2	2	0	1	0	0	0	2	1	0	0	0	2	Automatic discharge
1004392910	5	5860000	1	6.7679	HE	30	264.2	141.601	58	3.23	429	365	171.3	40.7	24.5	1.82	0.94	5.5	199.9	30	5.37	169	85	24	4	1	0	1	1	0	1	44	22.4913	42	0	0	0	0	1	0	0	0	3	1	0	0	0	3	Death
1004876505	5	346000	1	5.53908	HE	30	163.7	110.2	30	4	1290	1101	107.1	25.3	20.4	1.62	0.73	1.56	131.3	27.5	7.15	103	172	20	4	1	0	0	0	0	0	72	20.5761	1	1	1	1	0	1	0	0	1	1	1	0	0	0	3	Automatic discharge
1005074636	5	152000	1	5.18184	Jaundice	25	365.2	108.303	78	1.93	130	227	291.5	22.7	40.5	1.98	0.84	4.47	143.4	25.7	10.13	144	136	40	0	1	0	0	1	0	1	41	51.9031	1	1	2	3	0	0	0	0	1	1	1	1	0	0	2	Better discharge
1005428074	5	100000000	2	8	Virus replication	40	339.3	53.5019	123	5.59	1022	688	238.9	32.7	27.1	2.54	1.1	7.82	278.5	20.2	5.41	138	126	14	0	0	0	0	0	0	1	63	19.0311	0.5	1	2	3	0	0	0	0	0	2	1	0	0	0	2	Automatic discharge
1005506798	5	7600	1	3.88081	Jaundice	29	415.7	124.085	47	2.55	26	42	247	39.5	17.5	2.8	0.79	5.1	100	20.5	9.68	107	66	30	2	0	0	0	1	0	1	49	23.1834	0.5	1	2	3	0	1	0	0	1	2	1	0	1	0	2	Automatic discharge
1003918878	6	824000	1	5.91593	Jaundice	28	617.8	136.471	45	2.05	122	119	458.7	35.3	24.5	1.46	0.42	4.25	62.8	24.8	6.38	120	41	39	0	0	0	0	1	0	1	38	20.0692	2	1	2	2	0	0	0	0	0	2	1	0	0	0	1	Automatic discharge
1004059838	6	150000	1	5.17609	Jaundice	31	397.5	145.078	29	3.09	2021	1064	278.8	34.3	22.8	1.78	0.76	1.71	56	27	8.34	114	119	25	2	1	0	0	1	0	1	55	19.0311	2	0	0	0	0	1	0	0	0	1	1	0	1	0	3	Liver transplantation
1005263820	6	500	0	2.69897	Jaundice	23	133.7	127.414	48	2.24	22	54	61	24.4	48.7	2.47	1.27	3.35	179.9	21.5	3.55	110	58	35	0	0	0	0	1	1	1	44	20.7612	11	0	0	0	0	0	0	0	0	1	1	0	0	0	1	Automatic discharge
1005558902	6	500	0	2.69897	HE	37	258.2	117.507	43	6.26	1015	647	159	23.4	29.3	3.43	0.99	1.53	170.6	15	13.23	105	149	13	4	1	0	1	0	0	0	46	20.9572	21	0	0	0	0	1	0	1	1	2	1	0	0	0	3	Automatic discharge
1006506344	6	31100	1	4.49276	Jaundice	27	397.7	68.5867	99	1.96	1296	748	302	37.3	22.3	2.9	1.34	4.41	224.8	20.9	5.07	158	98	40	0	0	0	0	1	1	1	65	23.1834	0.5	0	0	0	0	0	0	0	0	1	1	0	0	0	1	Better discharge
2001072634	6	3.75	0	0.574031	Ascites	20	67.2	97.7826	46	2.13	78	138	31.7	27.9	36.2	3.08	0.8	7.06	212.3	21.4	3.4	101	43	37	0	0	0	0	0	0	0	69	23.6244	3	1	3	3	0	0	0	1	1	1	1	0	0	0	1	Automatic discharge
1003590666	7	9600000	1	6.98227	Jaundice	25	128.7	138.535	56	2.57	444	517	84.1	29	31.2	1.58	0.57	3.37	108	24.8	4.18	111	72	31	0	0	0	0	0	0	1	51	19.7232	2.5	1	2	3	0	0	0	0	0	1	1	1	0	0	1	Automatic discharge
1004066329	7	7090000	1	6.85065	Jaundice	26	390.4	146.246	63	1.98	340	89	277	35.8	25.6	2.03	0.96	4.76	104.9	22.1	4.24	130	102	40	0	0	0	0	0	0	1	35	24.2215	12	0	0	0	0	0	0	0	0	1	1	0	1	0	1	Better discharge
1004543828	7	3210000	1	6.50651	Jaundice	30	507.5	122.197	71	2.73	62	132	382.7	32.5	23.9	1.59	0.85	3.41	115.9	21.1	7.58	103	45	29	2	1	0	1	0	0	1	40	26.2976	9	1	2	3	0	1	1	0	1	2	2	0	1	0	3	Death
1004985400	7	1020	1	3.0086	Jaundice	28	337	111.998	72	2.58	145	157	216.4	35.5	28.1	2.79	0.87	7.03	276.3	32.5	7.38	113	114	31	0	0	0	0	1	1	1	50	24.2215	1.25	0	0	0	0	0	0	0	1	1	1	0	3	0	2	Better discharge
1005044059	7	1700	1	3.23045	Jaundice	34	332.1	75.727	95	4.12	187	201	261.3	29.8	36.3	1.5	0.92	5.62	188.7	26.2	3.63	84	75	20	0	0	0	0	1	1	1	58	22.1453	1	1	2	3	0	0	0	0	0	2	1	0	1	0	2	Automatic discharge
1006496435	7	611000000	2	8.78604	Virus replication	26	226.2	101.75	56	2.33	1767	1050	160.3	34	24.9	2.86	1.6	3.1	150.6	20.3	5	125	122	33	0	0	0	0	1	1	1	67	24.2215	10	0	0	0	0	0	0	0	1	1	1	0	0	0	1	Automatic discharge
1003672791	8	24100000	2	7.38202	Jaundice	31	459.2	119.814	65	3.03	663	532	334.9	28.7	30.9	2.24	1.11	5.31	104.8	22.9	7.82	133	82	25	2	1	0	0	1	1	1	58	25.9516	22	1	2	3	0	1	0	1	1	2	1	1	0	0	3	Automatic discharge
1003687335	8	12200000	2	7.08636	Ascites	26	85.2	92.2997	88	3.46	29	44	57.3	20.3	48.7	1.08	0.48	3.92	259.9	29.4	4.48	101	41	23	0	0	0	0	0	0	1	43	26.2976	21	1	2	3	0	0	0	1	0	1	1	1	0	0	1	Automatic discharge
1004819382	8	940000	1	5.97313	HE	37	470	129.8	72	4.96	942	165	297.5	34.7	14.9	1.23	0.9	2.02	87.5	24.9	6.9	130	94	17	4	1	0	1	1	1	1	29	21.4533	7	1	1	1	0	1	1	0	0	2	1	0	1	0	3	Coma
1005008376	8	52200000	2	7.71767	Ascites	22	135.2	130.061	58	1.99	1549	1503	102.7	34.1	38.7	2.37	0.88	2.59	201.6	22.6	6.69	158	128	40	0	0	0	0	0	0	1	30	28.3737	4	0	0	0	0	0	0	0	0	1	1	1	0	0	1	Automatic discharge
1003353993	9	1480000	1	6.17026	Jaundice	27	413	135.538	36	2.22	177	117	317.9	23	21.5	1.24	0.84	4.1	81.9	24.2	10.38	98	71	36	0	1	0	0	0	0	0	34	20.1951	2	1	2	3	0	0	0	0	0	4	4	0	2	0	2	Automatic discharge
1003778603	9	7030000	1	6.84696	HE	35	344.1	118.599	49	4.69	1579	504	229.9	27.1	22.6	1.48	0.76	1.89	62.8	26.8	4.92	144	75	17	4	1	0	0	0	0	1	53	23.1834	12	1	2	2	0	1	1	1	1	1	1	1	1	0	3	Coma
1004103948	9	3310	1	3.51983	Jaundice	35	480.5	124.852	54	4.06	249	78	270	39	26.8	1.93	0.67	2.57	47	26.2	15.39	152	73	19	3	1	0	0	1	0	1	40	23.1834	22	0	0	0	0	1	0	0	1	2	2	0	2	0	3	Liver transplantation
1005188891	10	4160000	1	6.61909	Jaundice	25	277.5	104.381	75	1.97	1838	1682	217.3	39.2	29.4	3.28	2.18	5.37	204.3	20.8	3.74	153	128	40	0	0	0	0	0	1	1	53	23.8754	30	0	0	0	0	0	0	0	0	1	1	0	1	0	1	Better discharge
1001616012	11	500	0	2.69897	Ascites	20	94.3	131.27	65	1.97	32	85	81.7	32.6	37	3.98	1.63	2.4	206.5	25.1	7.2	101	417	40	0	0	0	0	0	1	1	45	20.7612	5	1	3	3	0	0	0	0	1	2	1	0	1	0	1	Automatic discharge
1004138800	11	1000	1	3	Jaundice	31	387.2	110.696	61	3.27	239	231	244.1	34.1	19.4	2.04	1.13	2.79	85.6	26.5	7.03	141	103	24	2	1	0	0	0	0	1	50	28.2007	21	1	2	2	0	1	0	0	0	2	1	0	0	0	3	Automatic discharge
1004338356	11	181000	1	5.25768	Ascites	25	175.2	74.9968	114	1.95	2926	1490	138.1	39.5	31.2	4.07	3.13	2.84	272.8	21.9	8	169	161	40	0	1	0	0	1	1	1	28	26.9896	1.5	0	0	0	0	0	0	0	0	2	1	1	0	0	1	Better discharge
1005971602	11	6270	1	3.79727	Jaundice	27	512.9	109.235	77	1.99	416	107	377.3	35.4	23.8	2.17	1.27	7.03	125.9	24.8	11.84	138	151	40	0	1	0	0	1	1	1	42	17.474	1	1	2	3	0	0	0	0	1	2	1	0	1	0	2	Automatic discharge
1003842271	11	121000	1	5.08279	Jaundice	23	184.5	118.811	71	1.98	168	85	141.8	33.5	39	3.6	1.74	3.99	209.7	26.5	8.01	144	121	40	0	0	0	0	1	1	1	44	25.9516	2	0	0	0	0	0	0	1	0	1	2	0	0	0	1	Better discharge
1004008185	11	3970000	1	6.59879	Jaundice	25	265.4	125.841	47	1.99	559	314	198.1	29.3	33.6	2.15	1	3.68	140.1	22.6	4.83	117	90	40	0	0	0	0	1	1	1	47	23.1834	12	1	2	2	0	0	0	0	0	1	2	0	0	0	1	Better discharge
1004461280	11	4430000	1	6.6464	Jaundice	30	261.2	145.993	62	3.25	1212	922	147.7	32.9	33.7	2.39	0.99	2.4	74.9	21.6	8.63	143	165	24	0	0	0	0	0	0	1	38	26.9896	4	1	2	1	0	0	0	0	1	1	2	0	0	0	2	Automatic discharge
1005203687	11	37000000	2	7.5682	Ascites	18	41.6	147.921	65	2.04	1584	963	24.7	38.7	23.4	2.93	1.37	2.6	307	26.9	6.32	153	182	39	0	0	0	0	1	1	1	28	21.6263	6	0	0	0	0	0	0	0	0	1	2	1	0	0	1	Better discharge
1005990419	11	500	0	2.69897	Jaundice	32	376.1	125.454	49	3.54	86	85	184.8	35.3	16.5	2.85	0.84	2.53	112.1	22.2	7.32	129	84	22	0	0	0	0	0	0	1	45	23.8754	0.5	0	0	0	0	0	0	1	0	1	2	0	1	0	2	Automatic discharge
1003773569	12	455000	1	5.65801	Jaundice	25	317.3	121.253	60	2.04	76	84	236.6	37.2	38.8	2.35	1.08	6.04	237.9	26	4.81	137	103	39	0	0	0	0	0	0	1	38	17.301	12	1	2	3	0	0	0	1	0	1	2	0	1	0	1	Better discharge
1004889798	12	21500	1	4.33244	Jaundice	30	275.1	82.5195	89	3.11	225	423	198.4	26.6	32.6	1.51	0.87	3.5	81.1	19	7.26	117	74	25	2	1	0	0	1	1	1	57	22.4913	2	1	1	1	0	1	0	0	1	3	2	0	1	0	3	Automatic discharge
1005017792	13	2990	1	3.47567	Jaundice	29	180.5	144.059	68	3.26	109	150	142.6	38.7	23.7	3.3	1.64	2.83	336.5	27.6	5.05	132	211	24	0	0	0	0	0	0	1	24	20.4152	1	0	0	0	0	0	0	0	0	1	2	0	0	0	1	Better discharge
1005232483	13	500	0	2.69897	Jaundice	26	268.3	139.837	65	2.36	31	73	222	34.5	14.4	1.48	0.87	4.19	134	25.8	6.08	103	87	33	0	0	0	0	1	0	1	36	20.7612	11	1	2	3	0	0	0	0	0	1	2	0	1	0	1	Automatic discharge
1006166275	13	25700000	2	7.40993	Jaundice	26	369.2	126.473	57	1.99	87	69	288.5	35.3	30.8	3.44	1.56	9.2	122.6	25.5	11.33	140	42	40	0	0	0	0	0	0	1	35	20.0692	0.6	1	3	3	0	0	0	1	0	1	2	0	1	0	1	Automatic discharge
1001938797	14	8150000	1	6.91116	Jaundice	27	428.2	132.373	43	2.07	713	525	293.7	28.2	23.5	1.83	0.82	2.78	83.7	23.4	4.21	140	39	38	0	0	0	0	0	0	1	45	17.301	8	1	2	1	0	0	0	1	0	2	2	0	2	0	1	Automatic discharge
1002167817	14	500	0	2.69897	Ascites	19	57.6	145.222	63	1.96	761	207	15.8	38.8	30.2	2.61	0.52	5.52	269.7	28.6	4.47	151	110	40	0	0	0	0	1	1	1	36	21.7993	6	0	0	0	0	0	0	0	0	2	2	0	1	0	1	Better discharge
1003610721	14	7690000	1	6.88593	Ascites	21	62.1	108.486	56	2.42	251	142	48.8	24	54.1	2.18	0.69	4.31	157	29.6	13.63	135	85	32	0	0	0	0	0	0	0	45	19.8141	2.5	1	2	3	0	0	0	0	1	1	2	0	0	0	1	Automatic discharge
1004094005	14	2980	1	3.47422	Jaundice	23	155.8	83.448	94	1.97	380	316	121.9	36.8	36.9	2.63	1.31	3.78	240.2	25.5	5.26	129	109	40	0	0	0	0	1	0	1	46	26.6436	12	0	0	0	0	0	0	0	0	1	2	0	0	0	1	Better discharge
1004143700	14	36900	1	4.56703	Jaundice	26	291.9	114.138	76	2.19	302	137	224.1	33.3	28	2.57	1.76	2.63	157.1	24.4	7.01	153	159	36	0	0	0	0	0	1	1	38	30.4498	22	1	2	3	0	0	0	0	0	2	2	1	1	0	1	Better discharge
1004605523	14	19900000	1	7.29885	Jaundice	27	342.3	136.187	68	2.36	927	541	225.7	40.9	30.5	2.68	1.17	2.7	104.2	20.9	5.97	153	187	33	0	0	0	0	1	0	1	32	21.1073	16	1	2	3	0	0	0	0	0	1	2	0	1	0	1	Automatic discharge
1004685238	14	5350000	1	6.72835	Jaundice	29	437.9	126.069	70	2.49	67	97	311	30.9	35.9	1.79	0.98	3.4	107.1	21.2	2.22	118	40	32	0	0	0	0	1	1	1	38	29.0657	3	0	0	0	0	0	0	0	0	2	2	1	2	0	1	Automatic discharge
1004851157	14	144000	1	5.15836	Jaundice	41	400	40.344	159	4.56	337	138	281.5	28.4	26.7	1.29	0.86	13.63	220.2	21	14.72	143	134	18	1	1	0	1	0	1	1	59	23.8754	1	1	2	3	0	1	0	1	0	3	2	0	1	0	3	Death
1005179542	14	5080	1	3.70586	Jaundice	28	155.4	119.031	47	3.21	4324	1341	110.7	37.8	22	2.25	0.84	1.81	170.6	19.9	11.4	138	77	24	0	1	0	0	0	0	0	40	22.1003	1	0	0	0	0	0	0	0	1	2	2	0	0	0	2	Better discharge
1005248276	14	5530000	1	6.74273	Ascites	19	57.6	86.6862	83	2.01	980	695	35.8	35.8	23.4	2.24	0.92	7.18	271.1	24.7	4.48	124	94	40	2	1	0	0	1	0	1	62	19.0311	33	1	3	3	0	1	1	1	1	4	2	0	0	0	1	Coma
1005301939	14	500	0	2.69897	Jaundice	26	411.7	121.822	50	1.98	59	119	323.3	32.4	34.3	3.17	1.27	5.21	113.9	19.2	11.41	96	207	40	0	0	0	0	0	0	1	48	17.9931	16	1	3	3	0	0	0	1	0	2	3	0	1	0	1	Better discharge
1005470623	14	397000	1	5.59879	Jaundice	25	191.4	124.197	49	2.23	1162	1212	147.6	26.2	26.8	3.45	1.36	3	133	24.5	4.73	98	81	35	0	0	0	0	0	0	0	32	18.6709	3	1	2	3	0	0	0	0	0	1	2	0	0	0	1	Better discharge
1006116611	14	5830	1	3.76567	Ascites	26	158	52.3137	129	2.01	39	109	130.9	38.8	44.1	6.94	3.52	8.8	491	27.6	13.96	168	205	39	0	1	0	0	0	0	1	58	24.5675	1	1	2	3	0	0	0	1	1	3	3	0	0	0	1	Better discharge
1006146168	14	4180	1	3.62118	Jaundice	27	357.2	77.5594	91	2.14	27	48	270	35.2	33.7	2.21	0.92	6.7	160	16.6	10.38	91	77	36	0	0	0	0	0	1	1	62	25.9516	5	1	2	3	0	0	0	1	1	1	2	0	1	0	1	Automatic discharge
1317787	15	1230000000	2	9.08991	Virus replication	23	213.5	109.154	56	1.95	189	246	174.3	25.7	30.5	2.04	0.84	2.3	122	23.8	3.92	144	116	40	0	0	0	0	1	0	1	57	23.1834	10	1	2	1	0	0	0	0	0	1	2	0	3	0	1	Better discharge
1002646447	15	17500000	2	7.24304	Jaundice	23	191	106.181	71	1.98	294	458	196.5	33.6	23.3	2	0.79	3.9	261.2	27.3	2.38	142	52	40	0	0	0	0	0	0	1	60	20.7612	10	0	0	0	0	0	0	0	1	1	2	0	0	0	1	Better discharge
1004056034	15	162000000	2	8.20952	Virus replication	27	291.7	126.445	64	2.42	1255	751	220.3	32.7	25	2.59	1.11	2.06	105.1	26	6.22	140	109	33	0	0	0	0	0	0	1	53	25.9516	12	1	2	3	0	0	0	0	0	2	2	1	1	0	1	Liver transplantation
1004059502	15	59100000	2	7.77159	Jaundice	24	163.9	150.153	62	2.19	162	138	110.2	25.1	27.7	1.83	1	2.28	91	28.4	7.21	125	53	36	0	0	0	0	1	0	1	34	23.8754	22	1	2	3	0	0	0	1	0	3	2	0	1	0	1	Better discharge
1004474856	15	80280	1	4.90461	Jaundice	26	213.6	142.194	63	2.43	1170	527	152.7	30.5	25.9	2.39	1.15	1.85	139.3	25.9	5.41	134	94	32	0	0	0	0	0	0	1	39	22.6644	11	1	2	2	0	0	0	0	0	1	2	0	1	0	1	Better discharge
1005177413	15	500	0	2.69897	HE	31	306.5	118.709	74	3.32	378	150	186.1	29.8	27.5	1.22	0.63	2.59	181.2	29.5	4.54	125	50	24	3	0	0	0	0	1	1	37	23.8754	5	0	0	0	0	1	0	0	1	1	2	0	2	0	3	Automatic discharge
1005213990	15	115	0	2.0607	Ascites	34	41.7	108.427	67	8.93	29	37	16.2	29.8	26.1	3.48	0.65	5.64	100.2	25.5	3.41	87	63	9	0	0	0	0	0	0	1	67	22.4913	30	1	2	3	0	0	0	1	1	1	2	0	0	0	1	Better discharge
1005459180	15	1230000	1	6.08991	Jaundice	25	298.4	106.604	75	1.97	473	412	236.4	32.7	28.7	3.71	1.73	5.45	223.6	22.6	3.8	113	121	40	0	0	0	0	0	0	1	50	24.2215	11	0	0	0	0	0	0	1	0	1	2	1	1	0	1	Better discharge
1005873008	15	115000	1	5.0607	Jaundice	30	447.5	133.863	67	2.7	721	160	286.5	33.7	22.9	2.15	0.91	3.62	99.4	26.6	10.28	135	120	29	1	0	0	0	0	0	1	37	22.8374	20	1	2	3	0	1	0	0	1	2	2	1	1	0	2	Automatic discharge
1050941	16	4750000	1	6.67669	Jaundice	29	309.6	117.28	53	2.73	1599	1665	237.8	35.2	27.4	2.01	1.24	3.5	148	24	5.52	119	139	29	0	1	0	0	0	0	1	50	24.2215	10	0	0	0	0	0	0	1	1	1	2	0	1	0	3	Liver transplantation
1003929539	16	500	0	2.69897	Jaundice	27	275.4	125.073	49	2.44	642	419	199.2	30.4	25.6	2.7	1.25	1.27	141.7	23.3	7.47	114	127	32	0	0	0	0	0	0	0	31	22.1003	12	1	2	3	0	0	0	0	1	2	2	0	1	0	1	Better discharge
1004083207	16	214000	1	5.33041	Jaundice	23	181.5	131.888	64	1.99	713	412	134.7	35.8	35.7	3.33	1.26	2.99	151.9	22.5	3.95	135	74	40	0	0	0	0	1	1	1	47	24.2215	2	0	0	0	0	0	0	0	0	1	2	1	1	0	1	Better discharge
1004601372	16	42500000	2	7.62839	Ascites	24	193.4	103.833	78	2.04	41	83	165.6	27.5	39.8	1.62	1.15	5.48	175.5	21.6	4.06	91	121	39	0	0	0	0	0	0	1	47	17.9931	27	1	2	3	0	0	0	1	1	1	2	0	0	0	1	Automatic discharge
1004666010	16	35000	1	4.54407	Jaundice	25	286.3	128.312	48	2.12	62	62	227.5	34.8	34.7	3.95	2.02	3.82	195.6	24.5	4.13	129	161	38	0	0	0	0	0	0	1	43	25.6055	1	1	2	3	0	0	0	0	0	1	2	0	0	0	1	Better discharge
1005386072	16	257000	1	5.40993	Jaundice	23	181.8	126.502	61	2	1108	760	137.9	36.1	27.6	2.6	1.42	1.8	116.6	24.2	3.57	147	109	40	0	0	0	0	0	0	1	31	27.3356	11	0	0	0	0	0	0	0	0	1	2	0	0	0	1	Better discharge
1005584688	16	3970000	1	6.59879	Jaundice	28	336.6	121.709	68	2.42	718	694	239.6	31.3	37.9	2.19	1.42	6.34	175.1	25.4	7.44	134	86	32	0	0	0	0	0	0	1	48	23.8754	8	1	2	3	0	0	0	1	0	1	2	1	1	0	1	Automatic discharge
1002182037	17	135000000	2	8.13033	Virus replication	27	386.9	117.203	54	2.1	1491	1656	281.6	34.6	33.4	4.99	1.54	6.3	166.3	23.1	8.63	146	72	38	0	0	0	0	1	1	1	49	22.1453	1	1	1	1	0	0	0	0	1	1	2	0	1	0	1	Automatic discharge
1005128691	20	12200	1	4.08636	Jaundice	33	348.1	132.263	52	3.94	457	260	222.1	29.2	21.8	1.06	0.63	1.55	110.7	27	6.19	118	159	20	0	0	0	0	0	0	1	34	26.9896	1	1	2	3	0	0	0	0	1	2	2	0	1	0	2	Automatic discharge
1003674952	21	100	0	2	Jaundice	33	396.2	114.887	73	3.65	46	78	237.7	40.4	35.8	1.78	0.75	7.62	240.2	25.9	3.51	86	22	21	0	0	0	0	0	0	1	44	14.1869	4	0	0	0	0	0	0	1	0	1	2	0	0	0	2	Better discharge
1005069472	21	4300000	1	6.63347	Jaundice	27	450.6	138.124	70	2.01	286	156	355.9	38.4	24.3	2.84	1.65	4.66	261.8	25.1	6.2	129	215	40	0	0	0	0	1	1	1	25	20.0692	16	0	0	0	0	0	0	0	0	1	2	1	1	0	1	Better discharge
1005142393	21	61700	1	4.79029	Jaundice	25	280.8	110.435	72	2	410	322	214.5	27.7	34.5	2.29	1.53	3.24	212.3	24.5	9.06	119	184	40	0	0	0	0	1	1	1	52	25.6055	9	0	0	0	0	0	0	0	0	1	2	1	1	0	1	Better discharge
1005198197	21	80900	1	4.90795	Jaundice	25	264.2	117.879	67	2.08	198	177	208.3	35.1	23.3	2.66	1.26	5.05	103.8	23.9	7.72	125	141	37	0	0	0	0	1	0	1	29	21.4533	10	0	0	0	0	0	0	0	0	1	2	1	1	0	1	Better discharge
1005901728	21	3210000	1	6.50651	Jaundice	26	332.7	117.098	56	2.13	620	293	245.7	27	45	1.66	0.99	2.6	117	25.3	7.04	110	84	36	0	0	0	0	1	1	1	47	26.2976	0.5	1	2	2	0	0	0	1	1	2	4	0	1	0	1	Automatic discharge
1004603132	21	500	0	2.69897	Jaundice	24	224.5	120.528	44	1.99	532	422	175.2	27.8	23.1	3.65	1.76	2.79	159.1	22.7	6.92	142	182	40	0	0	0	0	1	0	1	57	16.436	21	1	2	1	0	0	0	0	1	2	2	0	0	0	1	Better discharge
1004639566	21	49300	1	4.69285	HE	32	388.9	123.429	34	3.48	1051	274	264.2	28.6	17.3	1.55	0.74	1.22	72.5	23.8	8.16	111	74	23	3	1	0	1	0	0	0	50	26.2917	11	1	2	2	0	1	1	0	1	3	3	0	1	0	3	Death
1005830993	21	83500	1	4.92169	Jaundice	24	235.4	131.337	52	2.01	257	228	183	34	27.5	3.35	1.87	4.7	78	25.5	5.2	136	42	40	0	0	0	0	0	0	1	35	27.6817	10	1	2	3	0	0	0	1	0	1	2	1	0	0	1	Better discharge
1004810081	21	222000000	2	8.34635	Virus replication	27	316.6	91.182	81	2.38	385	358	246.7	24.3	29.3	1.62	1.08	7.48	145.9	27	7.85	119	145	34	0	0	0	0	0	1	1	59	18.3391	21	1	2	3	0	0	0	1	0	2	2	0	1	0	1	Better discharge
1005120996	21	8550000	1	6.93197	Jaundice	26	236.3	131.393	62	2.44	984	564	189	31.8	40.4	2.49	0.83	2.14	133	25	10.2	135	242	32	0	0	0	0	0	0	1	53	21.4533	1	1	2	3	0	0	0	0	1	3	4	0	1	0	1	Automatic discharge
1005953453	21	43500	1	4.63849	Jaundice	28	351.4	55.6544	97	2.26	48	127	253.5	33.8	39.2	1.86	0.83	4.19	204.5	23.1	6.6	93	75	35	0	0	0	0	0	0	0	58	25.7202	0.6	1	2	3	0	0	0	0	1	3	2	1	1	0	1	Death
1005983206	21	781000	1	5.89265	Jaundice	26	242.9	121.57	52	2.34	188	197	183.1	43.6	26.3	3.1	1.28	3.62	192	26.9	3.18	134	109	33	0	0	0	0	0	0	1	46	27.6817	30	0	0	0	0	0	0	1	0	1	2	0	1	0	1	Better discharge
1003694249	21	506000	1	5.70415	Jaundice	26	368.9	102.246	79	2.01	223	202	242.8	31.5	32.9	1.88	0.82	5.75	199.3	23.7	12.35	100	147	40	0	0	0	0	0	1	1	47	25.9516	4	1	2	3	0	0	0	0	1	3	3	0	1	0	1	Better discharge
1004504780	21	5580	1	3.74663	Jaundice	24	240.3	107.094	73	2.02	307	125	171.2	29.1	27.4	1.78	0.76	3.8	120.3	22.7	6.8	130	140	40	0	0	0	0	0	0	1	54	20.7612	7	1	2	3	0	0	0	0	0	1	3	0	0	0	1	Automatic discharge
1005927809	21	362000	1	5.55871	Jaundice	25	342.4	143.604	67	1.97	290	286	266.7	35	24.8	2.35	0.84	2.2	160	24	8.45	158	140	40	0	0	0	0	0	0	1	27	25.2595	0.5	1	2	1	0	0	0	0	0	2	3	1	1	0	1	Better discharge
1004072753	21	15400	1	4.18752	Jaundice	25	280.9	146.246	63	2.09	301	306	190	35.2	28.6	2.49	1.02	1.83	121.3	26.3	5.99	154	95	38	0	0	0	0	1	0	1	35	26.4706	32	1	2	3	0	0	0	0	1	1	3	0	1	0	1	Better discharge
1004078244	21	34300	1	4.53529	Ascites	27	433.2	134.757	61	2.02	80	92	324.2	31.1	24	1.73	0.74	1.89	124.7	25.1	10.9	114	139	40	0	0	0	0	0	0	1	22	23.5294	22	1	2	3	0	0	0	0	0	2	3	1	0	0	1	Better discharge
1004198209	21	2810000000	2	9.44871	Virus replication	25	260	116.944	49	2.13	199	146	216.4	36	25.6	1.67	0.73	2.43	102	23	5.45	85	159	37	0	0	0	0	1	1	1	55	24.5675	23	1	2	3	0	0	0	0	0	1	3	1	1	0	1	Automatic discharge
1004325689	21	493000	1	5.69285	Jaundice	26	432	140.688	54	1.98	174	78	324	30.8	10.2	1.58	1.05	2.63	139.8	22.2	6.38	146	63	40	0	0	0	0	0	0	1	23	20.4152	9.5	1	2	2	0	0	0	0	0	4	4	1	1	0	1	Better discharge
1005258188	22	500	0	2.69897	Jaundice	24	138	101.674	60	2.38	42	57	80.9	24.8	20.9	1.82	0.52	3.06	194.1	21.4	2.3	80	26	33	0	0	0	0	0	0	0	51	21.3382	19	1	2	3	0	0	0	1	0	4	4	0	0	0	1	Automatic discharge
1005859544	22	176000000	2	8.24551	Virus replication	24	137.7	118.751	61	2.3	1352	781	84	37.5	32.9	2.33	1.01	5.91	268	21.7	6.83	158	121	34	0	0	0	0	1	0	1	40	25.2595	0.5	1	2	3	0	0	0	0	1	3	3	1	1	0	1	Better discharge
1006016323	22	7040000	1	6.84757	Jaundice	25	101.1	101.397	51	2.82	18	40	58.2	26.1	34	2.06	1.62	6.42	193.9	32	2.88	85	32	27	0	0	0	0	0	0	0	59	23.6244	3	1	2	3	0	0	0	1	0	1	3	1	0	0	1	Better discharge
1004128002	23	387000000	2	8.58771	Virus replication	32	486.5	139.217	50	3.25	348	217	298.6	39.3	31.9	1.31	0.92	1.2	55.7	20.3	4.83	158	73	24	0	0	0	0	0	1	1	29	25.6055	4	1	2	0	0	0	0	0	0	2	3	0	0	0	2	Better discharge
1004705576	23	440000	1	5.64345	Jaundice	28	258.1	146.071	51	2.73	687	224	167.9	32.4	25.1	2.09	0.82	3.26	152.7	25.5	5.99	138	138	29	0	0	0	0	1	0	1	21	23.1834	11	0	0	0	0	0	0	0	0	2	3	0	1	0	1	Better discharge
1004728197	23	23600	1	4.37291	Jaundice	28	403.4	129.4	53	2.29	214	128	312.7	26.4	28.4	1.08	0.93	4.79	118.8	17.3	3.53	103	115	35	0	0	0	0	0	1	1	36	19.0311	17	0	0	0	0	0	0	0	1	2	3	0	3	0	1	Automatic discharge
1004815491	23	124000	1	5.09342	Jaundice	24	226.6	125.035	52	2.08	213	120	166.6	30.4	35.7	2.06	0.85	5.03	152.7	23.6	4.17	118	129	40	0	0	0	0	0	0	1	42	21.4533	1	1	2	3	0	0	0	0	1	3	3	0	0	0	1	Better discharge
1005213331	23	419	0	2.62221	Jaundice	23	158.9	127.44	67	2.07	30	67	97.6	32.7	39.9	2.86	0.91	3.5	227	22.3	3.62	109	116	38	0	0	0	0	0	0	1	44	36.6782	20	1	2	3	0	0	0	1	1	2	3	0	0	0	1	Better discharge
1005253684	23	170000000	2	8.23045	Jaundice	39	377.5	35.4762	181	3.61	744	746	265.9	27.5	29.3	2.28	0.84	10.68	406.8	25.9	3.96	145	64	22	3	1	0	1	0	0	1	55	22.4913	10	1	3	3	0	1	1	0	1	3	3	1	2	0	3	Death
1003819460	24	2380000	1	6.37658	Jaundice	24	262.2	157.208	64	1.98	1362	213	207.6	34.5	21.8	3.23	1.64	2.42	414.5	25.3	7.53	153	236	40	0	0	0	0	1	1	1	22	30.7958	7	1	2	3	0	0	0	0	1	2	3	0	1	0	1	Better discharge
1004066272	24	28200	1	4.45025	Jaundice	25	300.5	105.877	72	1.98	213	161	208	32.8	28.3	1.6	1.2	4.23	110.5	29.6	9.23	141	103	39	0	0	0	0	0	0	1	58	20.7612	7	1	2	3	0	0	0	1	1	4	4	1	2	0	1	Automatic discharge
1004295973	24	500	0	2.69897	Jaundice	27	409.2	122.108	57	2.17	108	187	303.2	28.1	25.7	2.36	1.24	4.22	101.8	23.7	5.81	91	69	37	0	0	0	0	1	0	1	40	25.6055	12	1	3	3	0	0	0	0	1	3	3	0	2	0	1	Automatic discharge
1005116386	24	49000	1	4.6902	Jaundice	25	288.2	99.1779	76	1.97	255	419	232.1	28.4	25.1	1.4	0.72	4.54	322.3	28.1	3.39	83	83	40	0	0	0	0	1	1	1	58	17.474	31	0	0	0	0	0	0	1	1	2	4	0	0	0	1	Automatic discharge
1005317502	24	4590000	1	6.66181	Jaundice	27	305.7	130.715	72	2.39	1424	1069	228.1	42.7	25.4	3.24	1.32	3.1	270	24.2	6.11	143	149	33	0	0	0	0	0	0	1	28	17.9931	11	1	2	2	0	0	0	0	0	2	3	0	1	0	1	Better discharge
1002886488	25	50000000	2	7.69897	Jaundice	26	255.4	119.037	46	2.4	74	384	186.7	20.9	39.5	2.09	0.91	1.18	128.4	26.2	1.47	111	147	32	0	1	0	0	0	0	0	41	23.6244	2	1	2	3	0	0	0	0	0	3	3	0	2	0	2	Better discharge
1003701968	25	6370	1	3.80414	Jaundice	30	389.2	79.8363	92	2.72	45	59	262.3	32.5	32.8	2.71	0.98	8.17	128.4	23.8	10.6	105	144	28	0	0	0	0	1	1	1	56	25.2595	17	1	2	3	0	0	0	0	1	3	3	0	3	0	2	Better discharge
1005043349	25	43000000	2	7.63347	Jaundice	27	576	108.646	52	1.98	103	176	445.9	40.7	38.7	4.08	2.31	4.93	149.8	26	6.09	137	155	40	0	0	0	0	1	1	1	62	17.9931	1	0	0	0	0	0	0	1	0	1	3	0	1	0	1	Better discharge
1005351980	25	500	0	2.69897	Jaundice	27	473.3	140.068	68	2.07	138	63	344	42.5	26	2.42	1.13	3.75	211.3	24.7	6.47	129	157	38	0	0	0	0	1	1	1	28	20.7612	1	0	0	0	0	0	0	0	0	1	3	0	1	0	1	Better discharge
1005665371	25	99700	1	4.9987	Jaundice	27	467.1	96.9978	83	2	34	121	376.8	28.9	30.7	3.78	2.16	5.61	130.6	23.7	8.44	111	221	40	0	0	0	0	0	0	1	46	25.9516	30	1	3	3	0	0	1	0	0	2	3	1	0	0	1	Automatic discharge
1005772613	25	7930	1	3.89927	Jaundice	30	426.1	107.101	57	2.73	145	95	259.1	32	35.6	2.12	1.11	3.69	111.1	25	9.05	94	179	29	0	0	0	0	0	0	0	46	17.1468	1	1	2	3	0	0	0	0	1	2	3	0	2	0	2	Automatic discharge
1006533492	25	26300000	2	7.41996	Jaundice	25	300.3	115.55	77	1.94	132	114	222.9	34.2	24	2.58	2.56	3.29	212.7	25.9	11.5	127	261	40	0	0	0	0	1	0	1	34	21.4533	0.5	0	0	0	0	0	0	0	0	4	4	1	1	0	1	Better discharge
1003632273	26	8.17	0	0.912222	Jaundice	25	265.9	110.146	73	2.11	56	60	185.6	35.6	30.1	2.49	1.12	2.83	153.5	24.1	4.28	122	44	37	0	0	0	0	1	1	1	50	25.2595	32	1	2	3	0	0	0	0	0	2	3	0	2	0	1	Better discharge
1004108686	26	8730	1	3.94101	Jaundice	26	393.3	124.861	35	2.04	94	94	266.2	32.3	25.5	1.99	0.78	1.87	95.4	28.3	4.65	93	143	39	1	0	0	0	0	0	0	47	23.2434	12	1	2	3	0	1	0	0	1	1	3	0	2	0	1	Better discharge
1004577331	26	33800	1	4.52892	Jaundice	25	199.1	115.435	60	2.33	912	334	125.4	30.1	33.6	2.01	1.04	2.37	92.6	24.3	10.6	119	357	34	0	0	0	0	0	0	1	45	18.3391	8	1	1	1	0	0	0	0	0	1	3	0	1	0	1	Better discharge
1006024397	31	500	0	2.69897	Jaundice	37	548.5	136.79	54	4.59	125	117	335.5	34	32.8	1.26	0.86	6.2	113.5	25.2	9.15	124	165	17	2	1	0	0	1	0	1	27	22.8374	10	1	1	1	0	1	0	0	1	2	3	1	2	0	3	Automatic discharge
1004462881	31	2180000	1	6.33846	Jaundice	26	290.9	131.901	59	2.12	218	120	218.2	33.2	23.8	2.33	1.02	7.4	158.3	21.9	6.02	133	89.5	37	0	0	0	0	0	0	1	27	20.7612	21	0	0	0	0	0	0	0	0	3	3	1	1	0	1	Better discharge
1004532436	31	125000	1	5.09691	Jaundice	26	331.7	76.3405	76	2.12	202	82	250.7	29.3	34.8	2.36	1.25	5.3	169.8	20.1	5.62	118	93	37	0	0	0	0	0	0	0	55	24.0055	1.5	1	2	3	0	0	0	0	0	2	3	0	1	0	1	Better discharge
1004758081	31	143000	1	5.15534	Jaundice	32	415.6	125.619	56	3.47	1493	1039	272	29.5	24.5	2.44	1.15	2.3	131.8	23.7	7.67	130	154	23	0	0	0	0	1	1	1	37	24.9135	11	1	2	3	0	0	0	0	1	4	4	0	3	0	2	Better discharge
1004797853	31	1700000000	2	9.23045	Virus replication	24	253.5	131.637	72	1.97	593	167	200	31.9	22.2	2.78	1.37	1.6	148	27.6	7	159	176	40	0	0	0	0	0	0	1	27	32.872	5	0	0	0	0	0	0	0	0	2	3	1	0	0	1	Better discharge
1001949228	31	1220	0	3.08636	Ascites	27	254.3	126.181	75	2.53	25	47	98.7	33.5	38.9	3.07	1.25	5.92	260	25.2	3.64	98	36	31	0	0	0	0	0	1	1	26	22.4913	6	1	2	2	0	0	0	0	0	1	1	1	0	0	2	Automatic discharge
1004464873	31	188000	1	5.27416	Jaundice	28	284.9	50.882	126	2.01	62	120	223.5	36.1	39.3	3.18	1.84	6.81	274.2	18.3	12.07	143	194	40	0	0	0	0	0	0	1	66	22.4913	41	1	2	3	0	0	0	1	1	3	3	0	0	0	1	Better discharge
1005112266	31	4120	1	3.6149	Jaundice	25	283.4	140.954	62	2.04	92	67	226.7	42.4	20.3	3.29	1.35	6.66	126.6	24	6.36	137	97	39	0	0	0	0	0	0	1	43	21.7993	8	0	0	0	0	0	0	0	0	2	3	0	1	0	1	Better discharge
1005571950	33	5120	0	3.70927	Jaundice	30	237.3	138.566	60	3.47	944	391	163.4	34.2	24.3	1.82	1.11	4.11	184	28.4	6.6	133	195	23	0	0	0	0	1	1	1	19	24.9135	1	0	0	0	0	0	0	0	0	2	3	1	0	0	2	Better discharge
1006195336	33	9910	1	3.99607	Jaundice	25	132.2	111.998	72	2.69	40	60	90.8	33.2	44	2.26	1.42	6.4	121.8	21.6	6.5	110	105	28	0	1	0	0	0	0	1	50	23.1834	0.6	0	0	0	0	0	0	0	1	2	3	0	0	0	2	Better discharge
1003782207	33	555	0	2.74429	Jaundice	28	629.8	138.648	67	2	126	227	449	37.6	24.7	3.13	1.97	5.02	97.5	23.8	6.64	133	117	39	0	0	0	0	0	0	1	32	28.0277	22	0	0	3	0	0	0	1	1	2	3	0	4	0	1	Automatic discharge
1004880547	32	19800	1	4.29667	Jaundice	23	186.8	120.405	57	1.99	961	459	143.2	31.2	31.3	2.64	0.75	2.75	196.5	23.2	2.86	139	87	40	0	0	0	0	0	0	1	42	24.9135	2	0	0	0	0	0	0	0	0	1	3	0	0	0	1	Better discharge
1005645741	32	170000000	2	8.23045	Virus replication	24	209	113.277	82	2.09	2208	1322	157.6	32.9	26.4	2.87	1.83	3.3	214	20.5	5.05	138	64	38	0	0	0	0	1	1	1	26	32.526	10	0	0	0	0	0	0	0	1	2	3	0	1	0	1	Better discharge
1003414905	31	2690	0	3.42975	Jaundice	23	185.5	147.576	64	2.03	53	91	133.6	24.3	27.4	1.89	1.01	4.25	86.4	16.6	3.08	80	23	38	0	0	0	0	0	0	1	31	23.8754	10	0	0	0	0	0	0	1	1	3	3	1	0	0	1	Automatic discharge
1003707564	31	10600	1	4.02531	Jaundice	29	395.1	62.7467	119	1.97	672	248	286.5	26.8	21	1.38	1.05	7.34	185.3	23.4	6.11	125	104	40	0	0	0	0	1	1	1	46	21.4533	2	1	2	3	0	0	0	1	1	3	3	0	1	0	1	Better discharge
1004232226	31	3030000	1	6.48144	Jaundice	28	416.9	113.562	75	2.25	590	247	288.3	33.3	25.7	1.93	0.85	3.52	143.2	23.6	5.89	152	105	35	0	0	0	0	1	0	1	41	25.9516	1	0	0	0	0	0	0	0	0	2	3	0	2	0	1	Better discharge
1005533341	31	5660	1	3.75282	Jaundice	27	395.8	103.692	79	2.13	209	120	297.4	30.3	30	2.36	1.05	3.93	138.5	22	9.94	141	92	37	0	0	0	0	0	0	1	45	34.6021	21	1	2	3	0	0	0	0	0	2	3	0	2	0	1	Better discharge
1005633106	31	44100000	2	7.64444	Jaundice	25	286.8	159.108	63	1.97	1764	977	215.1	37.9	22.3	2.4	1.16	4.24	262.5	20.4	7.4	144	169	40	0	0	0	0	0	0	1	23	27.6817	14	0	0	0	0	0	0	0	0	3	4	1	1	0	1	Better discharge
1005717782	31	1530000	1	6.18469	Jaundice	27	395	123.808	64	2.08	253	532	295	26.9	23.4	1.51	0.75	2.73	120.3	19.9	6.52	100	97	38	0	0	0	0	1	0	1	56	22.4913	2	1	2	3	0	0	0	0	0	3	3	0	3	0	1	Automatic discharge
1006593201	31	678000	1	5.83123	Jaundice	31	340.9	116.235	59	3.16	852	693	245.5	29.6	21.8	1.08	0.71	4.81	102.6	25.8	9.75	137	99	24	0	0	0	0	1	0	1	45	26.9896	0.5	1	3	3	0	0	0	0	1	2	4	0	2	0	2	Better discharge
1004340187	31	8550	0	3.93197	Jaundice	30	336.2	104.423	79	2.88	107	136	226.1	21.3	33.5	1.25	0.88	2.77	153.8	22.3	6.96	131	109	27	0	0	0	0	1	0	1	44	21.7993	1	1	2	3	0	0	0	0	0	2	4	1	2	0	2	Automatic discharge
1005835095	32	4130	0	3.61595	Jaundice	24	195.9	136.319	66	2.17	168	175	149.8	34.4	35	1.69	1.14	1.7	169	26.1	5.58	122	106	37	0	0	0	0	1	0	1	37	20.4152	20	1	2	2	0	0	0	0	0	2	4	1	0	0	1	Better discharge
1005864074	32	16000000	2	7.20412	Jaundice	26	187.8	147.576	64	2.63	727	537	134.1	32.5	27.2	2.79	1.07	1.52	184.1	24.1	4.49	133	131	29	0	0	0	0	1	1	1	31	31.8339	10	1	2	3	0	0	0	1	1	2	4	0	2	0	1	Better discharge
1006048270	32	4650000	1	6.66745	Jaundice	26	212.1	117.185	77	2.36	755	502	152.2	37.5	27.4	2.8	1.36	3.34	215.5	28.3	3.36	137	73	32	0	0	0	0	0	0	1	32	20.4152	12	0	0	0	0	0	0	1	0	3	4	0	1	0	1	Better discharge
1004651959	33	832	0	2.92012	Jaundice	26	417	126.812	48	1.98	751	407	311.1	33.4	28.8	1.86	0.93	2.28	142.4	21.2	6.25	109	179	40	0	0	0	0	0	0	0	30	17.9089	7	0	0	0	0	0	0	0	1	2	4	0	2	0	1	Automatic discharge
1004732274	33	20800	1	4.31806	Jaundice	26	386.4	83.687	89	1.98	151	107	291.6	33.4	25.1	2.41	1.26	7.29	158.4	22.6	6.28	131	126	40	0	0	0	0	1	0	1	55	22.4913	31	1	2	3	0	0	1	0	0	4	4	0	2	0	1	Automatic discharge
1005951427	33	1290	1	3.11059	Jaundice	27	452.9	111.45	60	2	880	769	336.2	46.4	29	3.14	2.16	6.07	182	24	3.81	158	125	40	0	0	0	0	1	1	1	50	18.3391	14	0	0	0	0	0	0	1	0	3	4	0	0	0	1	Better discharge
1004292102	34	500	0	2.69897	Jaundice	27	344.9	132.053	44	2.26	1870	1469	263.8	34.1	22.5	3.51	1.38	3.87	178	26.3	8.69	162	101	35	0	0	0	0	0	0	1	44	19.7232	10.5	1	2	3	0	0	0	1	0	2	4	0	3	0	1	Better discharge
1004628903	34	36000	1	4.5563	Jaundice	25	254.8	122.093	58	2.06	303	259	184.7	32.8	25.9	2.02	1.1	3.57	167.6	25	3.83	130	68	38	0	0	0	0	1	1	1	39	24.2215	11	0	0	0	0	0	0	0	0	4	4	1	0	0	1	Better discharge
1004926056	34	7190000	1	6.85673	Jaundice	25	209.4	102.815	58	2.23	312	202	159.5	25.5	32.2	2.14	1.25	4.72	231.1	26.6	4.45	101	58	36	0	0	0	0	0	1	0	51	21.3382	1	1	2	3	0	0	0	0	0	3	4	0	1	0	1	Better discharge
1005444115	34	93700000	2	7.97174	Jaundice	24	214.2	134.44	72	1.97	2562	2253	170.9	31.4	21.8	2.38	0.89	3.95	183.9	20.8	6.9	143	95	40	0	0	0	0	1	0	1	24	20.0692	1	0	0	0	0	0	0	0	0	3	4	0	2	0	1	Better discharge
1004090724	35	417000	1	5.62014	Jaundice	25	333.5	138.55	58	1.96	420	209	252.6	34.9	21.4	2.38	0.96	1.7	113.5	28.2	8.89	129	164	40	0	0	0	0	0	0	1	21	20.7612	2	1	2	3	0	0	0	0	0	2	4	0	0	0	1	Better discharge
1004800370	35	698000	1	5.84386	Jaundice	29	282.4	117.893	60	2.81	130	123	171.5	37.1	30.7	1.55	0.66	5.09	203.8	24.7	10.82	145	154	28	0	0	0	0	0	0	1	42	23.8754	17	1	2	3	0	0	0	0	0	2	4	1	1	0	2	Better discharge
1005782103	35	2260000	1	6.35411	Jaundice	25	259	123	56	2.04	603	369	196.8	32.8	27	2.8	1.36	3.3	223	21.7	4.34	141	137	39	0	0	0	0	0	0	1	40	23.5294	11	1	2	3	0	0	0	0	0	4	4	1	1	0	1	Better discharge
1003631685	36	13700000	2	7.13672	Jaundice	27	238.6	140.068	68	2.67	936	559	140.5	29.1	28.5	3.1	1.73	2.63	128.4	27.2	5.72	137	108	29	0	0	0	0	1	0	1	28	16.263	2	1	2	3	0	0	0	0	1	3	4	1	2	0	2	Better discharge
1004332638	36	277000000	2	8.44248	Virus replication	26	438.2	131.024	61	1.98	383	128	340	31.7	15	1.61	0.88	3.13	83.4	24	6.18	150	92	40	0	0	0	0	1	1	1	26	25.2595	12.5	1	2	3	0	0	0	0	0	2	4	0	3	0	1	Better discharge
1003930584	37	80400000	2	7.90526	Jaundice	25	321.1	140.688	54	1.95	2104	1490	230.1	39	25.5	4.01	2.2	2.51	274.9	23.3	6.33	146	125	40	0	0	0	0	0	1	1	23	20.0692	17	1	2	2	0	0	0	0	0	3	4	1	1	0	1	Better discharge
1004476545	37	3420	1	3.53403	Jaundice	32	542.3	63.0626	122	2.36	53	114	390.2	37.3	22	2.19	1.15	8.5	390.4	25.9	5.55	106	76	34	0	1	0	0	0	0	1	41	25.6055	11.25	1	3	3	0	0	0	0	1	2	4	0	3	0	2	Automatic discharge
1004878661	37	375000000	2	8.57403	Virus replication	25	304.1	109.559	80	2.07	109	93	234.7	37.9	35.9	3.32	1.87	3.09	168	28.3	4.24	156	104	40	0	0	0	0	1	1	1	35	28.0277	1	1	2	3	0	0	0	0	0	4	4	1	3	0	1	Better discharge
1004805575	38	2040000	1	6.30963	Ascites	24	158.6	117.054	59	2.29	829	159	116	31.3	20.2	2.3	0.91	3.63	127.4	24.7	5.27	135	61	35	0	0	0	0	1	0	1	44	25.9516	4.25	1	2	2	0	0	0	1	0	2	4	1	1	0	1	Automatic discharge
1004794943	39	500	0	2.69897	Jaundice	33	416.6	123	56	3.79	31	49	210.3	45.6	19.4	2	0.99	5.27	167.7	26.3	5.88	105	72	21	0	0	0	0	0	0	1	40	23.7024	16	1	2	3	0	0	0	1	1	3	4	0	2	0	2	Better discharge
1004866815	39	246000	1	5.39094	Ascites	24	249.2	122.479	62	1.98	590	378	185.2	29.9	25.5	1.99	0.82	7.19	176.9	23.8	3.49	91	148	40	0	0	0	0	0	0	1	63	21.4533	1	1	3	2	0	0	0	0	1	2	4	0	2	0	1	Better discharge
1005604712	39	500	0	2.69897	Jaundice	25	291.7	123.808	64	1.97	1250	623	218.1	29.1	25.4	2.54	0.93	3.78	114.5	23.9	5.33	136	117	40	0	0	0	0	1	0	1	56	19.3772	11	0	0	0	0	0	0	0	1	3	4	0	0	0	1	Better discharge
1204656	40	131	0	2.11727	Jaundice	22	156.9	103.894	55	1.91	24	66	126.6	42.8	29.6	2.94	1.35	5.59	190	20.7	3.59	107	154	40	0	0	0	0	0	0	0	52	17.1468	5	1	2	3	0	0	0	0	0	3	4	0	0	0	1	Better discharge
1002498512	40	207000000	2	8.31597	Virus replication	25	215.8	148.617	64	2.2	426	248	169.5	29.3	29.1	2.43	1.16	2.41	108.8	25.6	2.84	147	125	37	0	0	0	0	0	0	1	30	24.7405	11	0	0	0	0	0	0	1	0	2	4	1	3	0	1	Better discharge
1004714544	40	100	0	2	Ascites	16	16.1	105.117	75	2.39	965	1192	7	32.1	21.6	2.37	1.04	6.68	350	14.1	3.89	142	54	34	0	1	0	0	0	0	1	52	20.0692	11.25	1	3	3	0	0	0	0	1	4	4	0	0	0	1	Automatic discharge
1004216996	41	12000	1	4.07918	Jaundice	30	224.4	71.3514	107	3.01	84	232	176.1	26.7	34.1	1.75	0.81	27.15	450.4	26.8	16.26	108	12	26	0	1	0	0	1	0	1	46	22.8374	1.5	1	2	3	0	0	0	1	1	4	4	0	1	0	3	Better discharge
1004987539	41	50500000	2	7.70329	Ascites	26	162.2	134.747	69	2.73	369	208	93.7	31	32.6	2.23	0.93	1.78	120.3	24.4	4.7	123	121	30	0	0	0	0	1	0	1	31	22.8374	8	1	2	2	0	0	0	0	0	3	4	0	1	0	1	Automatic discharge
1005613463	41	500	0	2.69897	Jaundice	25	335.5	124.427	63	1.96	615	261	254.1	36.7	33.2	3.52	2.1	3.42	57.3	22.5	5.14	117	73	40	0	0	0	0	0	0	1	58	20.0692	1	1	2	1	0	0	0	0	0	4	4	0	3	0	1	Automatic discharge
1005705713	41	19700000	2	7.29447	Jaundice	24	137.9	138.846	47	2.41	293	506	79.5	28.2	33.9	1.93	0.92	2.75	280.8	21.9	5.45	133	58	33	0	0	0	0	1	0	1	33	31.1419	2	1	2	1	0	0	0	1	0	2	4	1	0	0	1	Automatic discharge
1005730550	42	4200000	1	6.62325	Jaundice	29	147	138.015	61	3.63	755	813	99.7	33.9	28.7	1.73	0.64	1.42	114.7	23.2	6.64	108	56	22	0	1	0	0	0	0	0	36	20.5761	30	1	2	3	0	0	0	0	1	1	4	0	1	0	2	Better discharge
1004559346	43	54600	1	4.73719	Jaundice	26	444.8	116.266	69	1.96	288	219	341.1	30.7	21.3	2.21	2.11	4.24	155.7	22.9	4.62	136	93	40	0	0	0	0	0	0	1	52	21.1073	23	1	2	1	0	0	0	0	0	4	4	0	1	0	1	Automatic discharge
2001249957	44	6700	0	3.82607	Jaundice	32	396.4	135.729	48	3.39	407	133	274.2	30.9	26.8	2.01	0.92	2.9	53	21.4	7.74	130	126	23	0	0	0	0	0	1	1	35	25.6055	1	1	2	3	0	0	0	0	1	4	4	1	2	0	2	Better discharge
1002614509	45	500	0	2.69897	Jaundice	25	353	125.294	50	1.96	46	54	245.8	34.8	21.6	2.24	0.94	5.8	78	27.1	10.96	129	86	40	1	0	0	0	1	0	1	44	24.2215	0.6	1	2	2	0	1	0	0	0	4	4	1	1	0	1	Automatic discharge
1005186531	45	2330000	1	6.36736	Jaundice	28	323.8	113.562	75	2.51	465	357	239.5	29.2	24.7	1.89	0.86	5.55	140.6	24	5.11	123	71	31	0	0	0	0	0	1	1	41	22.4913	1	1	2	3	0	0	0	1	1	2	4	1	1	0	2	Better discharge
1004416353	46	1470000	1	6.16732	Jaundice	25	226.8	82.8304	102	2.03	496	203	178.1	33.8	24.1	3.16	1.23	2.85	252.5	24.5	4.81	139	127	39	0	0	0	0	0	0	1	33	29.4118	1	0	0	0	0	0	0	0	1	3	4	0	3	0	1	Better discharge
1004742134	46	2210000000	2	9.34439	Virus replication	26	225.3	128.291	61	2.4	329	126	164.3	32	21.7	1.8	0.82	3.05	66.8	16.4	12.52	135	93	33	0	0	0	0	0	0	1	29	24.9135	12	0	0	0	0	0	0	0	0	3	4	0	1	0	1	Better discharge
1004849836	46	488	0	2.68842	Jaundice	25	308.6	120.126	75	1.96	82	112	230.7	33.6	35.9	3.64	1.65	5.45	181.3	22.9	6.32	128	189	40	0	0	0	0	0	0	1	33	26.2976	11	0	0	0	0	0	0	0	0	2	4	0	1	0	1	Automatic discharge
1001103688	47	5560	0	3.74507	Jaundice	29	154.4	96.6584	79	3.44	131	205	115.3	42.1	37.4	3.75	1.42	5.9	244	24.3	4.12	134	84	22	1	1	0	0	1	1	1	55	19.7232	0.6	1	3	3	0	1	1	1	1	4	4	1	4	0	2	Automatic discharge
1004771490	47	533000	1	5.72673	Jaundice	33	531.5	123.867	56	3.51	152	136	370.6	35.2	19.7	1.79	0.94	4.48	132.9	25.3	4.94	113	61	23	0	0	0	0	0	0	1	39	23.1834	2.25	1	3	3	0	0	0	0	0	4	4	1	1	0	2	Automatic discharge
1001102022	48	500	0	2.69897	Jaundice	24	252.2	100.249	78	1.98	294	283	182.5	33.7	41.7	2.39	1.27	4.43	152.7	21.6	7.37	142	154	40	0	0	0	0	0	0	1	52	19.0311	11	1	2	2	0	0	0	1	0	3	4	0	1	0	1	Better discharge
1005581881	48	343000000	2	8.53529	Virus replication	24	234.2	133.814	61	1.98	78	50	155.9	36	21.7	1.93	0.83	5.22	148	24.2	5.69	146	189	40	0	0	0	0	0	0	1	23	20.0692	20	1	2	1	0	0	0	0	0	3	4	1	2	0	1	Better discharge
1003811135	49	24700000	2	7.3927	Jaundice	24	213.2	137.956	52	2.11	602	456	159.6	38.6	26.9	2.83	1.85	3.21	177.5	25.2	5.57	151	161	37	0	0	0	0	1	1	1	28	25.7785	4	1	2	3	0	0	0	0	1	4	4	1	1	0	1	Better discharge
1004315887	49	13200000	2	7.12057	Jaundice	24	226.8	109.112	74	2.05	2152	1339	177.2	33.9	23.9	3.3	1.64	2.27	175.9	23	6.96	141	210	39	0	0	0	0	0	0	1	49	27.6817	1	1	2	3	0	0	0	0	1	4	4	1	3	0	1	Better discharge
1005512711	51	500	0	2.69897	Jaundice	24	258.2	106.044	78	1.98	93	96	204.2	27.7	25.2	2.63	1.31	5.4	180	22.9	4.46	128	49	40	0	0	0	0	0	0	1	44	26.6436	1	1	3	3	0	0	0	1	0	4	4	0	2	0	1	Better discharge
1005837443	51	48300000	2	7.68395	Jaundice	27	287.1	138.846	47	2.37	835	684	198.2	38.1	20	2.09	1.13	3.03	72	23.8	5.54	142	102	33	0	0	0	0	1	1	1	33	16.609	0.5	1	2	3	0	0	0	0	0	4	4	0	1	0	1	Better discharge
1006050943	51	541	0	2.7332	Jaundice	25	303.8	123.441	70	1.98	80	153	235.5	28	47.1	2.92	1.27	2.57	161.4	24.4	6.7	135	234	40	0	0	0	0	0	0	1	41	25.9516	6	0	0	0	0	0	0	0	0	3	4	1	1	0	1	Automatic discharge
1004732735	53	240000	1	5.38021	Ascites	29	332.3	132.106	39	2.71	163	196	228.8	30.9	46.9	2.06	1.03	4.09	141	25.3	6.68	92	90	29	0	0	0	0	1	1	1	51	19.7232	2	1	2	3	0	0	0	0	0	4	4	0	2	0	2	Better discharge
1004738970	53	99200	1	4.99651	Jaundice	31	308.7	136.603	64	3.32	748	338	195.2	30.3	22.7	2.03	1.32	1.04	90.9	25.4	8.11	137	127	24	1	0	0	0	0	0	1	42	29.4118	1.25	1	2	2	0	1	0	1	1	3	4	0	3	0	2	Better discharge
1005623561	54	66200	1	4.82086	Jaundice	26	257.9	133.088	53	2.38	799	387	188.5	33.6	27.5	2.28	0.94	1.4	72	24.9	4.05	134	123	33	0	0	0	0	0	0	1	32	24.2215	20	0	0	0	0	0	0	0	0	4	4	1	2	0	1	Better discharge
1005832522	58	2390000	1	6.3784	Jaundice	31	294.9	124.737	61	3.3	415	328	189.1	27.4	31.2	1.42	0.94	2.02	86.6	22	10.37	127	162	23	0	0	0	0	1	0	1	33	29.4118	10	1	3	3	0	0	0	0	0	4	4	1	2	0	2	Better discharge
1004865374	62	30100000	2	7.47857	Ascites	28	148.1	126.204	72	3.28	730	406	119.4	35.1	24.7	1.54	0.85	2.13	184.6	25.8	6.04	159	100	25	0	1	0	0	0	0	1	33	25.9516	3	1	2	3	0	0	0	0	1	4	4	1	4	0	2	Better discharge
1004709999	63	81200	1	4.90956	Jaundice	29	407.8	103.151	58	2.55	413	234	249.6	33.3	25.8	2.23	0.86	3.6	72.3	24.4	4.67	128	105	31	0	0	0	0	1	1	1	63	17.474	41	1	2	1	0	0	0	0	0	4	4	0	4	0	2	Automatic discharge
1004532401	65	314000	1	5.49693	Jaundice	31	302.9	159.953	62	3.39	885	570	192.2	31.6	25.2	1.99	0.89	2.89	85.9	23.5	10.05	148	173	23	0	0	0	0	1	1	1	25	22.4913	15.5	1	2	3	0	0	0	0	0	4	4	0	4	0	2	Better discharge
1004666564	66	500	0	2.69897	Jaundice	28	426	171.72	29	2.26	397	118	299.1	33.9	15.5	2.23	1.21	5.59	52.4	26.2	14.64	166	113	36	1	1	0	0	0	0	1	31	25.0865	14.25	1	2	1	0	1	0	0	1	4	4	1	3	0	2	Better discharge
1005728045	67	22900	1	4.35984	Jaundice	26	373.9	126.553	55	2.05	1079	834	266.3	32.6	36.7	1.83	1.2	3	170	22.4	4.62	141	119	39	0	0	0	0	1	0	1	37	19.0311	1	1	2	2	0	0	0	0	1	4	4	0	2	0	1	Better discharge
1003395873	68	140000000	2	8.14613	Virus replication	34	347.4	141.066	46	4.34	1698	758	212.3	30.7	20.9	2.13	0.95	1.86	59.2	22.1	5.59	142	95	18	0	1	0	0	0	0	1	32	25.2595	2	1	2	2	0	0	0	0	1	4	4	1	3	0	3	Better discharge
1005360819	75	11900	1	4.07555	Jaundice	25	310.7	131.995	67	2.01	590	222	211	34	28.2	3.31	1.64	3.49	185.9	21.9	12.7	163	123	40	0	0	0	0	1	0	1	39	26.2976	21	0	0	0	0	0	0	0	0	4	4	1	3	0	1	Better discharge
1142912	77	17000000	2	7.23045	Ascites	22	133.3	134.026	53	2.02	656	703	97.4	34.4	23.5	2.75	1	4.54	137.1	21.8	7.55	141	70	39	0	1	0	1	0	0	1	31	20.0692	12	1	2	2	0	0	0	1	1	3	4	0	4	0	2	Death
1004384441	78	12800000	2	7.10721	Jaundice	28	269.7	131.614	66	2.76	181	173	194.8	29.7	31.5	1.74	0.91	2.02	114.7	21.5	6.55	117	98	28	0	0	0	0	0	0	1	42	20.7612	24	1	2	3	0	0	0	1	1	4	4	0	4	0	2	Better discharge
1003864225	81	946000	1	5.97589	Jaundice	31	351.2	136.187	68	3.14	591	176	228.5	30.1	29.3	0.96	0.68	2.24	82.4	22.8	6.35	126	125	25	0	0	0	0	0	0	1	32	24.2215	1	1	2	2	0	0	0	1	0	4	4	1	1	0	2	Better discharge
1005376384	96	334000	1	5.52375	Jaundice	26	322.4	138.015	62	2.21	1261	391	225.3	29.5	24.3	2.9	1.17	1.82	104.3	21.3	6.71	143	95	36	0	0	0	0	1	0	1	46	28.3737	1	1	2	3	0	0	0	0	1	4	4	0	3	0	1	Better discharge
1223720	0	1570000	1	6.1959	Infection	19	73.2	113.013	74	1.96	219	73	52.2	29.1	41.2	4.21	2.06	3.05	312.3	24.8	5.22	146	181	39	0	0	0	0	1	1	1	44	22.1453	9	1	2	2	1	0	0	0	0	0	0	0	0	0	1	Death
1003704992	0	500	0	2.69897	Infection	23	176.7	107.261	70	1.92	60	114	135.8	35.8	39.1	2.56	1.23	7.72	136.5	24.6	4.13	91	47	40	0	0	0	0	1	1	1	61	17.6471	18	1	2	3	1	0	0	1	0	0	0	0	0	0	1	Automatic discharge
1004093255	0	696000	1	5.84261	Infection	29	175.8	106.413	49	3.31	875	551	115.1	28.9	37.3	2.65	1.02	2.24	117.3	26.4	8.62	116	201	23	0	0	0	0	1	0	1	53	19.0311	32	1	2	3	1	0	0	0	0	0	0	0	0	0	1	Automatic discharge
1004801431	0	100000000	2	8	Virus replication	28	20.6	11.6754	446	1.99	347	323	12.8	25	26.9	3.12	1.71	22.71	325.9	18.8	4.18	88	111	39	0	0	0	0	0	0	1	56	27.3356	1.75	0	0	0	1	0	0	0	0	0	0	0	0	1	1	Automatic discharge
1004847069	0	23400	1	4.36922	Infection	27	145.8	48.3187	141	1.99	73	163	74.9	27.3	34.2	2.22	0.88	13.59	742.3	22.6	4.17	148	55	40	0	1	1	0	0	1	1	54	22.1453	20	1	3	2	1	0	1	1	1	0	0	0	0	0	1	Automatic discharge
1005669168	0	9210	1	3.96426	Infection	23	174.5	149.36	63	2.01	321	147	135.3	25.4	26.4	2.84	1.14	2.13	171.2	24.1	6.03	137	131	39	0	0	0	0	0	0	0	66	22.1003	18	0	0	0	1	0	0	0	0	0	0	0	0	0	1	Better discharge
1005715603	0	15400	1	4.18752	Infection	25	298.3	117.054	59	1.97	652	487	222.6	31.3	25.9	2.82	1.34	1.8	159.2	23.4	3.53	134	81	40	0	0	0	0	1	1	1	79	24.9135	11	0	0	0	1	0	0	0	0	0	0	1	1	0	1	Liver transplantation
1006467636	0	1420000000	2	9.15229	Virus replication	24	218.5	138.419	49	2.05	1195	921	161.5	33.4	25.4	2.8	1.25	1.87	193.2	25.8	3.85	144	120	38	0	0	0	0	1	1	1	31	15.2249	0.8	0	0	0	1	0	0	0	0	0	0	1	0	0	1	Automatic discharge
1006541830	0	240000	1	5.38021	Infection	26	327.7	110.415	75	2.14	94	115	258.9	29.6	25.4	2.23	1.05	4	149	25.1	6.15	149	69	36	0	0	0	0	0	0	1	67	21.7993	10	0	0	0	1	0	0	0	0	0	0	0	1	0	1	Better discharge
1005826027	1	17400	1	4.24055	Jaundice	27	611	114.362	75	1.94	109	122	383.3	42.2	14.8	1.37	0.58	14.45	193.7	17	10.73	80	58	40	0	1	0	0	0	0	1	40	20.7612	11	0	0	0	1	0	0	0	0	2	1	0	1	0	2	Liver transplantation
1003666772	2	320000	1	5.50515	Infection	21	99.1	143.488	64	2	137	224	74	30	29.1	6.73	3.12	7.68	314	27.2	5.23	117	238	39	0	0	0	0	1	1	1	31	22.1453	2	0	0	0	1	0	0	0	0	1	1	0	0	0	1	Automatic discharge
1005616200	2	458000	1	5.66087	Jaundice	42	381	127.853	46	8.29	587	332	225.3	28.2	23.3	1.49	0.86	1.8	81	19.7	11.97	152	95	10	4	1	0	1	1	0	1	50	25.2595	2	0	0	0	1	1	0	0	1	2	1	1	0	0	3	Automatic discharge
1006065510	2	19900000	2	7.29885	Jaundice	29	423.5	96.6371	72	2.51	258	330	287	26.4	45.6	1.72	0.89	4.54	136.9	21.9	2.81	94	92	30	1	0	0	0	0	0	1	71	27.3356	1.5	1	2	3	1	1	0	1	0	2	1	0	1	0	2	Automatic discharge
2001156286	2	1760	1	3.24551	Infection	27	291.5	93.3876	67	2.42	68	64	221.1	21.3	26.8	3.32	1.86	9.4	252.6	25.5	8.3	101	25	32	0	0	0	0	0	0	1	25	19.0311	1	1	2	3	1	0	0	0	1	1	1	0	0	0	1	Automatic discharge
1004199742	3	500	0	2.69897	Ascites	31	324.6	98.6773	75	3.18	444	228	231.8	23.9	30.8	2.58	1.05	4.75	169.1	23.9	7.44	130	45	24	1	0	0	0	1	1	1	61	28.7197	2	0	0	0	1	1	0	0	0	1	1	0	0	0	2	Automatic discharge
1005051217	3	1670000	1	6.22272	Jaundice	27	547.5	143.956	62	1.91	76	198	429.5	29.1	28.2	1.66	0.78	6.39	83.8	30.3	6.4	128	42	40	0	0	0	0	1	1	1	53	25.2595	7	0	0	0	1	0	0	1	0	1	1	1	0	0	1	Automatic discharge
1005621419	3	3590	1	3.55509	HE	46	453.3	19.8477	303	4.05	571	267	321.6	30.4	20.5	1.52	1.01	13.79	705	17.5	8.81	131	104	19	4	1	0	0	1	1	1	46	22.4913	7	1	2	3	1	1	1	0	1	1	1	0	0	0	3	Automatic discharge
1005859142	3	1810000	1	6.25768	Ascites	37	260.1	32.7535	166	3.62	711	1146	156.4	25.9	26	1.19	0.76	2.26	184.5	24.3	11.13	107	87	22	2	1	0	0	0	0	0	41	21.3382	7	1	3	3	1	1	1	0	1	1	1	1	0	0	3	Automatic discharge
1005939787	3	22600000	2	7.35411	Infection	23	114.8	119.632	67	2.36	141	71	76	29.1	24.2	2.49	0.9	4.58	124.2	22.7	5.64	138	46	33	0	0	0	0	1	0	1	44	29.7578	1	0	0	0	1	0	0	0	0	1	1	1	0	0	1	Automatic discharge
1005943547	3	500	0	2.69897	Jaundice	35	376.5	118.346	70	4.48	91	69	251.1	25.6	34.8	0.81	0.69	6.96	217	20.9	3.48	91	10	18	0	1	0	0	1	1	1	63	20.0692	20	0	0	0	1	0	0	1	0	1	1	0	0	0	3	Automatic discharge
1003617393	4	129000	1	5.11059	GEVB	34	73.4	24.5055	256	2.96	318	255	44.3	18.2	28.2	1.96	0.95	15.98	333.5	8.9	31.35	75	142	26	2	0	0	0	0	0	1	44	22.4913	11	0	0	0	1	1	0	0	1	1	1	0	0	0	2	Automatic discharge
1004128037	4	710000	1	5.85126	Jaundice	36	366.9	42.9114	162	2.84	569	251	256.6	28	36.2	1.19	0.79	8.07	221.3	24.4	8.79	152	104	27	0	0	0	0	0	0	1	47	22.4913	17	1	2	3	1	0	0	0	1	1	1	0	0	0	2	Automatic discharge
1004902631	4	2240000	1	6.35025	HE	43	365.1	17.7771	315	3.29	61	69	182.1	28.6	14.6	1.7	0.95	21.21	754.3	36.6	8.18	59	40	24	4	1	0	0	0	1	1	58	23.1834	38	1	2	3	1	1	0	0	1	2	1	1	1	0	3	Liver transplantation
1004925310	4	103000	1	5.01284	Jaundice	40	641.6	64.4969	124	4.25	100	102	409.8	31.7	25.4	1.31	0.56	17.17	400.2	26.6	18.51	95	143	19	2	1	0	1	0	0	1	35	23.5294	21	1	2	3	1	1	1	0	0	2	1	0	1	0	3	Death
1005106202	4	14900	1	4.17319	Jaundice	28	481.3	118.975	65	2.13	224	208	354.3	30.4	26.8	1.29	0.98	5.8	116.4	24.8	6.83	108	73	37	0	0	0	0	1	1	1	43	25.2595	1	1	2	3	1	0	0	0	0	1	1	1	0	0	1	Better discharge
1005519502	4	6240000	1	6.79518	HE	31	209.7	136.991	52	3.95	1631	962	117.3	29.4	31.9	1.99	0.85	1.99	82.4	25.9	4.28	150	116	20	4	1	0	0	1	0	1	45	22.1453	13	0	0	0	1	1	0	0	0	1	1	0	0	0	3	Automatic discharge
1006195348	4	882	0	2.94547	Jaundice	28	763	164.633	29	1.96	59	30	531.4	39	12.6	2.73	1.03	9.51	51.4	22.9	11.83	164	26	40	4	0	0	0	1	0	1	37	20.7612	8	1	2	3	1	1	0	1	1	1	1	0	0	0	2	Death
1328465	5	500	0	2.69897	Ascites	34	42.8	43.1646	153	5.53	517	737	27.2	25.6	31.9	2.74	0.84	12.16	416.5	15.9	2.43	109	77	14	0	1	0	0	1	1	1	56	19.7232	7	0	0	0	1	0	0	0	0	1	1	0	0	0	2	Automatic discharge
1003947441	5	59500000	2	7.77452	Jaundice	37	411.3	169.324	29	5.12	2399	1705	289.4	28.4	21.1	2.49	1.4	0.96	82.1	21.8	10.77	138	169	16	1	0	0	0	1	0	1	33	30.7958	2	0	0	0	1	1	0	0	0	1	1	0	0	0	2	Automatic discharge
1003996854	5	2100000	1	6.32222	Jaundice	37	339.4	32.6831	156	3.44	164	267	222.4	24.8	30	1.56	0.8	11.62	383.1	25.2	6.78	89	131	22	0	0	0	0	0	0	0	52	20.1951	4	1	2	3	1	0	1	0	1	1	1	0	0	0	2	Automatic discharge
1004533571	5	500	0	2.69897	Jaundice	43	708.9	10.5059	413	1.92	39	36	527.2	23.8	15.7	0.99	0.56	29.49	556.4	14.9	13.18	82	36	40	0	1	0	1	0	0	0	46	20.5761	28	0	0	0	1	0	1	1	1	2	1	0	1	0	3	Automatic discharge
1005323055	5	47100	1	4.67302	Infection	23	184.8	109.714	41	1.96	66	95	131.9	24.1	35.2	1.52	0.85	2.4	125.2	23.1	3.46	109	114	38	0	0	0	0	0	0	0	58	19.8141	20	0	0	0	1	0	0	1	0	3	1	1	0	0	1	Automatic discharge
1005325372	5	193	0	2.28556	Infection	36	282.1	101.807	86	5.46	1355	1000	155.8	30	26.1	1.61	0.85	1.3	145.7	27.3	9.48	119	102	16	2	1	0	0	0	0	1	33	22.4913	1	1	2	3	1	1	0	0	1	2	1	0	0	0	3	Automatic discharge
1003778569	6	114000000	2	8.0569	Virus replication	37	521.6	102.543	77	4.77	989	897	337.9	30.3	21.4	1.2	0.86	3.39	68.5	24.3	7.78	120	185	17	4	0	0	0	1	0	1	64	29.7578	1	0	0	0	1	1	1	0	0	1	1	1	0	0	3	Death
1004086085	6	35900000	2	7.55509	Ascites	31	162.9	55.8383	116	3.25	82	119	101.4	27.5	58.6	1.47	0.78	11.67	547	27.4	6.11	111	59	24	1	0	0	0	1	0	1	67	20.7612	12	1	2	3	1	1	0	1	0	1	1	0	0	0	1	Better discharge
1004593280	6	170000000	2	8.23045	Virus replication	24	249.8	113.81	74	1.92	162	278	192.9	23.8	33	1.76	0.99	6.71	236.6	20.3	3.51	107	37	40	0	0	0	0	1	0	1	43	22.4913	3.5	1	2	3	1	0	0	1	1	1	1	0	0	0	1	Automatic discharge
1005929852	6	74000000	2	7.86923	Ascites	33	215.4	122.18	67	4.64	971	849	152.4	33.3	27.9	2.03	1.04	1.59	104.9	30.7	7.07	145	157	17	2	0	0	0	0	0	1	50	25.0865	20	1	2	1	1	1	0	0	1	1	1	0	1	0	2	Automatic discharge
1003730286	7	100	0	2	Infection	24	76.5	87.3971	91	2.78	17	32	46.6	23.1	24.6	1.23	0.86	4.24	157.6	21.9	2.02	86	26	28	1	0	0	0	1	1	1	73	20.4152	8	0	0	0	1	1	0	1	1	2	2	0	0	0	1	Automatic discharge
1003980021	7	1770	1	3.24797	Jaundice	45	681.1	32.9851	221	4.23	106	246	520.2	32.6	20.4	1.07	1.01	12.36	211.9	40.1	16.98	155	80	19	2	1	0	0	1	1	1	31	24.2215	22	0	0	0	1	1	1	0	1	3	2	0	0	0	3	Automatic discharge
1004852843	7	500	0	2.69897	Jaundice	43	488	32.1692	208	4.19	114	135	360	31.5	27.3	1.47	1	30.51	428	14.9	6.94	75	73	19	0	0	0	0	0	0	1	45	17.9931	20	1	2	3	1	0	1	1	0	2	1	0	1	0	3	Automatic discharge
1005751025	7	9980	1	3.99913	Jaundice	29	390.7	113.014	59	2.72	31	218	300.3	36.6	21.8	3	1.65	4.88	191	19.1	4.36	91	139	28	1	1	0	1	0	1	1	49	20.4152	10	1	3	3	1	1	1	1	0	3	2	0	0	0	3	Death
1005842028	7	825	0	2.91645	Jaundice	32	683.2	120.481	55	2.73	94	173	432.6	43.5	10.9	1.21	1.17	4	138	33.9	4.29	105	42	29	0	0	0	0	0	1	1	44	22.4913	1.7	1	2	3	1	0	0	1	0	1	1	1	0	0	2	Automatic discharge
1003984318	8	500	0	2.69897	Infection	22	51	73.9652	98	2.55	23	58	27.4	19.4	45.9	1.95	0.46	8.98	772.5	34.1	12.62	118	190	30	1	0	0	0	1	0	1	56	25.2595	6	1	2	3	1	1	0	1	0	3	2	0	0	0	1	Automatic discharge
1004791652	8	500	0	2.69897	Jaundice	35	424.9	40.1988	170	2.48	180	108	304.2	26.6	23.5	1.51	1.01	20.65	241.8	22	15.24	119	33	33	0	0	0	0	1	1	1	48	24.5675	14	1	1	1	1	0	1	1	1	2	2	0	0	0	1	Automatic discharge
1005238730	8	7140	0	3.8537	HE	26	206.6	160.23	47	2.54	1991	528	134.8	27	32	3.6	2.01	1.81	91.6	26.9	11.09	140	295	31	4	1	0	1	1	1	1	49	21.4533	21	0	0	0	1	1	0	0	0	1	1	1	0	0	3	Automatic discharge
1005306358	8	500	0	2.69897	Infection	20	82.4	89.3672	80	1.98	14	28	27.1	29.7	27	2.1	0.85	5.27	359.5	23.4	3.01	96	36	40	0	0	0	0	1	1	1	59	20.0692	4	1	3	3	1	0	0	1	0	1	1	0	0	0	1	Better discharge
1005398120	8	7800000	1	6.89209	Infection	26	235.2	128.234	64	2.42	1131	1248	181.8	30.5	34	1.91	1.02	5.46	121.2	26.2	8.49	151	157	32	2	1	0	0	1	1	1	51	17.301	4	1	2	1	1	1	0	0	1	4	2	0	1	0	2	Automatic discharge
1005589962	8	50200000	2	7.7007	Jaundice	32	459.4	109.639	50	3.12	1941	879	319.4	32.5	26.5	1.3	0.74	5.55	89.7	23.5	14.28	146	203	25	0	0	0	0	0	0	1	63	24.7405	30	1	2	3	1	0	1	0	1	2	1	0	0	0	2	Automatic discharge
1006600411	8	2600	1	3.41497	Infection	28	308.9	122.139	56	2.66	180	140	150.4	22	26.6	1.45	0.79	3.2	89	25	4.35	114	62	29	0	0	0	0	0	0	1	55	22.8374	0.5	1	2	1	1	0	0	1	0	2	1	0	0	0	2	Automatic discharge
1003482441	9	100000000	2	8	Virus replication	32	262.7	117.185	77	4.05	140	211	193.9	31.3	22.2	2.26	1.23	3.93	104.4	30.3	5.15	144	88	19	2	0	0	1	0	0	1	32	28.3737	5	1	2	3	1	1	1	0	1	2	1	1	1	0	3	Automatic discharge
1005771753	10	1560	1	3.19312	Ascites	24	161.1	94.9011	86	2.18	63	77	68.5	28.8	52.2	2.51	1.23	5.2	232	27.4	4.07	107	69	36	0	1	0	1	0	0	1	43	16.436	20	1	2	3	1	0	1	1	0	4	2	0	0	0	2	Automatic discharge
1006050754	11	87500	1	4.94201	Infection	23	103.3	105.439	39	2.4	347	338	73.6	24.8	33.2	1.71	0.61	2.69	175.7	31	5.59	131	98	32	0	0	0	0	0	0	1	41	19.0311	6	1	2	3	1	0	0	0	0	1	1	0	0	0	1	Better discharge
1002371535	11	2590	0	3.4133	Jaundice	26	421.7	134.779	48	1.95	61	123	317.5	33.5	35.2	2.76	2.57	2.24	70.6	25.7	5.28	106	118	39	0	0	0	0	0	0	1	49	21.4533	20	1	2	3	1	0	0	1	1	1	1	1	1	0	1	Automatic discharge
1003830353	11	4850	1	3.68574	Jaundice	27	461.9	134.697	64	1.99	89	49	359.9	35.3	14.4	2.99	1.13	5.5	73.6	22.6	8.78	100	20	40	0	0	0	1	1	0	1	44	17.301	31	1	2	3	1	0	1	0	1	2	1	0	0	0	1	Death
1004252497	11	3260000	1	6.51322	HE	44	652.6	12.2289	315	2.85	5	96	492.6	38.5	24	1.44	0.98	33.75	1053.1	20.4	9.54	100	81	27	4	1	0	1	0	0	0	71	20.5761	2	1	2	3	1	1	1	1	1	3	3	1	0	0	3	Death
1004624532	11	4750	1	3.67669	Jaundice	29	406.5	117.098	56	2.63	456	586	279.6	28.8	30.4	1.59	0.56	3.13	93.5	27.4	7.02	141	90	29	0	0	0	0	1	0	0	60	22.4813	4	1	2	2	1	0	0	1	0	1	1	0	1	0	2	Automatic discharge
1005112132	11	500	0	2.69897	Jaundice	27	493.6	92.0717	94	1.91	38	141	390.5	26.2	24.7	2.23	0.94	30.89	492.6	21.7	20.27	89	37	40	1	1	0	0	0	0	1	32	23.1834	8	0	0	0	1	1	1	0	1	2	1	0	0	0	2	Automatic discharge
1005764561	11	3170000	1	6.50106	Infection	21	95.5	92.3436	83	2.12	841	490	74.2	26.2	31.8	2.14	1.02	4.96	328.5	25.2	3.71	144	77	38	0	0	0	0	0	1	1	36	25.0865	30	0	0	0	1	0	0	0	0	1	1	1	0	0	1	Automatic discharge
1006135490	11	3540000	1	6.549	Infection	24	92.5	55.1232	120	2.02	55	70	77.1	24.8	40.6	2.78	1.26	15.1	369	27.4	5.01	103	110	38	0	1	1	0	0	0	1	63	15.5709	10	1	2	3	1	0	0	0	1	4	3	1	0	0	1	Automatic discharge
1006431779	11	347000	1	5.54033	Jaundice	34	353.2	134.412	50	4.24	578	124	204.3	30.2	17.4	2.43	1.05	2	76	22.3	11.68	147	112	18	3	1	0	0	1	1	1	34	23.1834	0.6	1	2	3	1	1	0	0	1	2	1	1	1	0	3	Automatic discharge
1002348314	11	87400000	2	7.94151	GEVB	27	241.1	108.643	47	2.62	903	1546	173	31.1	19.6	2.13	0.83	2.36	113	29.1	4.09	72.8	28.4	29	0	0	0	0	0	0	0	53	23.2434	25	1	2	3	1	0	0	1	0	4	3	0	5	0	2	Automatic discharge
1003563739	11	20800000	2	7.31806	Ascites	36	278.9	58.6816	131	3.9	87	222	215.2	22	51	1.39	0.94	17.8	307	24.5	14.72	92	117	20	2	1	0	0	0	0	1	39	22.4913	20	1	3	3	1	1	1	1	1	2	2	0	0	0	3	Automatic discharge
1004847052	11	500	0	2.69897	Infection	24	234.3	119.901	45	1.95	1601	1009	187.6	31.5	28.4	1.91	1.71	6.5	120.1	18	8.41	131	60	39	0	0	0	0	0	0	0	41	20.5761	1	0	0	0	1	0	0	0	0	1	2	0	0	0	1	Better discharge
1005003012	11	8850000	1	6.94694	Ascites	24	237.5	109.324	53	1.89	236	332	185.1	30.4	26.2	4.08	2.03	4.14	133.6	25.3	3.92	110	79	40	0	0	0	0	1	0	1	60	17.301	3	1	3	3	1	0	0	0	0	2	3	0	0	0	1	Automatic discharge
1005065076	11	500	0	2.69897	Infection	40	213.9	15.6943	381	2.53	1576	1895	105.3	37.2	23.7	1.92	1.11	37.69	1244.7	12.7	12.03	109	197	31	0	0	0	0	1	0	1	43	22.1453	1	0	0	0	1	0	0	0	0	2	2	0	0	0	3	Automatic discharge
1005748975	11	500	0	2.69897	Ascites	43	432	35.1755	174	5	33	57	299.3	28.7	15.1	1.37	0.54	16.8	350	27.4	5.07	93	43	16	1	0	0	1	1	1	1	63	22.1453	21	1	2	3	1	1	1	1	1	1	2	0	0	0	3	Automatic discharge
1006082361	11	67300000	2	7.82802	Jaundice	29	418.6	103.163	60	2.57	771	575	300.4	26.3	26.1	1.38	0.85	5.9	94	25.2	6.3	128	85	30	1	0	0	0	0	0	1	61	24.9135	0.5	0	0	0	1	1	0	0	1	1	2	0	0	0	2	Better discharge
1001736083	12	132000	1	5.12057	Infection	25	219.8	124.301	68	2.24	832	277	159.1	24.9	20.8	1.79	0.97	3.37	158.8	29.2	5.49	139	172	35	0	0	0	0	1	1	0	49	22.8624	4	1	2	3	1	0	0	0	0	1	2	0	0	0	1	Better discharge
1002722626	12	20200	1	4.30535	Jaundice	33	469.9	122.329	53	3.61	71	49	375.2	35.8	19.5	2.43	1.17	8.16	114.4	24.7	16.96	84	84	21	1	1	0	0	1	1	1	44	22.8374	20	1	2	3	1	1	0	1	0	2	3	0	3	0	3	Automatic discharge
1003627493	12	53100	1	4.72509	Ascites	26	315.3	144.587	48	2.17	1330	700	217.6	37.3	25.2	1.6	1.15	3.1	147.4	24.9	3.55	160	39	37	0	0	0	0	1	1	1	26	27.6817	2	1	2	3	1	0	0	0	1	1	2	1	1	0	1	Better discharge
1003895471	12	204000	1	5.30963	Jaundice	27	378	118.472	72	2.13	15	73	266	30.7	19.2	1.26	0.87	4.1	129	25.9	4.52	110	86	37	0	0	0	0	0	0	1	32	25.7785	2	1	2	3	1	0	0	0	1	1	2	1	0	0	1	Better discharge
1004607847	12	243000	1	5.38561	Jaundice	35	649.1	46.5925	154	2.33	34	68	476.7	34.7	15.4	1.21	1.09	7.76	161.8	25.5	7.09	119	94	34	0	0	0	0	0	0	1	44	22.8374	16	1	3	3	1	0	0	0	1	3	2	1	0	0	1	Automatic discharge
1004998336	12	496000000	2	8.69548	Virus replication	29	162.6	127.067	50	3.47	323	170	102.1	33.4	39.8	1.67	0.66	5.83	104.5	20.9	3.55	124	61	23	2	1	0	0	0	0	1	42	17.9931	12.25	1	2	3	1	1	0	0	0	3	2	1	0	0	2	Automatic discharge
1005049441	12	8160	0	3.91169	GEVB	22	131.9	118.795	67	2.08	29	57	104.7	28.6	21.3	2.08	1.02	7.39	193.3	18.8	0.62	74	28	38	0	0	0	0	0	0	0	58	21.7193	14	0	0	0	1	0	0	1	1	1	2	1	0	0	1	Automatic discharge
1005104748	12	2290000	1	6.35984	Ascites	27	311.4	115.189	72	2.29	509	367	225.9	26.8	29.7	1.32	1.07	5.31	171.1	24.4	5.11	117	52	35	2	1	0	0	1	0	1	46	24.9135	9	1	2	3	1	1	1	1	1	3	2	0	1	0	2	Automatic discharge
1005520338	12	68000	1	4.83251	Infection	24	186.3	106.337	82	2.1	586	652	139.1	29	26.7	2.74	1.3	6.1	202	22	7.98	79	179	38	0	0	0	0	1	1	0	43	23.0529	6	1	3	3	1	0	0	1	0	1	2	0	0	0	1	Automatic discharge
1005733531	12	5280000	1	6.72263	Ascites	26	304.8	123.867	56	2.11	1437	628	221.1	33	22.9	2.01	0.81	2.46	130.1	24.4	5.59	145	136	38	0	0	0	0	0	0	1	39	23.8754	20	1	2	3	1	0	0	0	0	3	3	1	2	0	1	Liver transplantation
1005788232	12	90900	1	4.95856	HE	32	256.9	78.116	104	3.52	167	219	129.4	29.4	18.9	2.25	1.42	6	251.3	38.2	14.46	114	76	22	4	1	0	1	1	0	1	38	27.6817	20	1	3	2	1	1	1	0	1	4	3	1	1	0	3	Coma
1005892235	12	4460	1	3.64933	Ascites	27	277.1	117.518	46	2.4	303	191	174.1	35.1	22.7	2.32	0.98	5.2	142	24.2	9.65	127	130	33	0	0	0	0	1	1	1	58	26.6436	1	1	3	3	1	0	0	1	0	2	2	0	1	0	1	Automatic discharge
1004259259	13	441000	1	5.64444	Ascites	19	48.6	97.1308	63	2.1	49	63	26	20.2	46.3	3.52	0.71	6.56	269.1	22.5	4.1	109	86	38	0	0	0	0	0	0	0	53	20.5761	12	1	3	3	1	0	0	1	1	3	2	1	0	0	1	Better discharge
1005112150	13	6030000	1	6.78032	Ascites	26	260.9	67.6402	84	2.25	241	367	202.8	26.3	41.5	2.73	1.38	6.47	171.7	19.8	8.86	135	142	35	0	0	0	0	0	0	0	55	23.2434	30	1	3	2	1	0	0	1	1	1	2	1	1	0	1	Automatic discharge
1005727106	13	74700	1	4.87332	Infection	23	192.2	163.642	63	2	118	315	150.8	34.2	31.4	7.2	3.45	4.75	299.8	24.1	4.97	151	170	39	0	0	0	0	0	0	1	19	22.8374	0.7	1	3	3	1	0	0	1	1	1	2	0	0	0	1	Automatic discharge
1006130715	13	500	0	2.69897	Ascites	29	211.9	43.0309	157	1.98	88	73	146.6	34.2	24	3.63	1.08	8.4	149	24.9	8.15	127	52	39	1	1	1	1	0	0	1	52	29.4118	20	1	2	3	1	1	1	1	1	3	2	0	1	0	3	Automatic discharge
1002797684	14	500	0	2.69897	Jaundice	28	672.5	90.3749	88	2.06	99	146	496.7	36.5	14.7	1.67	0.75	14.7	150	31.3	10.79	113	107	38	2	0	0	0	1	0	1	46	20.7612	10	1	2	3	1	1	1	1	1	2	3	0	2	0	1	Automatic discharge
1003620702	14	7050000	1	6.84819	Infection	30	252.5	65.8559	115	2.76	191	379	170.1	28.7	38.1	2.78	0.82	9.79	621.5	25.8	13.17	136	159	28	0	0	0	0	0	0	1	45	24.2215	2	1	2	3	1	0	0	1	1	3	3	0	0	0	2	Automatic discharge
1004175604	14	3790	0	3.57864	Infection	45	297.4	33.6145	156	7.18	49	107	222.4	22.9	13.7	5.03	1.4	21.91	368.4	10.1	19.25	166	106	11	0	1	0	1	0	0	1	42	17.6471	2	1	1	1	1	0	0	0	1	4	3	1	0	0	3	Death
1004859504	14	139000	1	5.14301	HE	28	237.8	111.75	48	2.79	972	745	182.8	29.4	19.8	2.47	0.97	2.45	74.1	22.3	5.95	103	139	29	2	1	0	0	0	0	0	48	21.5287	13	1	2	2	1	1	0	0	1	2	1	0	1	0	3	Automatic discharge
1004944187	14	22200	1	4.34635	Jaundice	26	454.7	133.818	56	1.91	288	76	330.9	23.7	25.7	3.26	2.31	3.84	169.6	27.6	8.17	154	170	40	0	0	0	0	1	0	1	22	25.4325	10	0	0	0	1	0	0	0	0	1	2	1	0	0	1	Automatic discharge
1005311510	14	500	0	2.69897	Jaundice	28	439.6	119.592	56	2.27	106	204	331.9	22.4	17.9	2.16	1.01	2.94	75.2	25.1	3.19	87	82	35	0	0	0	0	1	1	1	28	20.0692	1	1	3	3	1	0	1	0	0	1	2	0	1	0	1	Automatic discharge
1003978521	15	2430000	1	6.38561	Jaundice	28	350.5	133.482	63	2.54	171	292	260.5	26.2	33.7	2.17	1.14	5.6	110.2	28.2	4.64	133	63	31	0	0	0	0	0	0	1	48	22.4913	2	1	3	2	1	0	1	0	0	1	2	1	0	0	2	Better discharge
1003983285	15	16600000	2	7.22011	Infection	24	158.2	76.1402	105	1.96	561	370	131.4	25.5	27.4	2.67	1.21	5.35	387.8	29.3	6.02	130	138	40	0	0	0	0	0	1	1	31	27.3356	2	1	2	3	1	0	0	0	0	2	2	0	1	0	1	Automatic discharge
1004666198	15	42800	1	4.63144	Infection	24	292.9	116.957	54	1.89	377	87	221.6	26.2	29.2	4.36	1.34	3.14	185.1	25.3	5.52	122	251	40	0	0	0	0	0	0	0	48	19.052	1	0	0	0	1	0	0	0	1	1	2	0	0	0	1	Automatic discharge
1004731806	15	12600	1	4.10037	Ascites	28	244.2	150.153	62	2.91	690	233	178.1	33.9	25	2.53	1.25	2.86	213.1	22.4	10.08	154	132	27	0	0	0	0	0	1	1	34	20.0692	1.5	0	0	0	1	0	0	0	0	2	2	0	1	0	2	Automatic discharge
1004988550	15	500	0	2.69897	Ascites	28	213	121.473	53	2.88	23	44	154.6	31.7	29.1	3.25	0.72	1.97	131.6	17.4	6.35	112	61	27	1	0	0	0	1	0	1	45	23.5294	6	0	0	0	1	1	1	1	1	3	3	0	0	0	2	Better discharge
1005502821	15	769	0	2.88593	Infection	21	121.4	118.8	55	1.96	35	58	80.1	30.4	28.8	3.87	1.56	5.43	214	26.4	4.32	113	38	40	0	0	0	0	0	0	0	44	20.1951	8	1	2	2	1	0	0	1	0	1	2	0	0	0	1	Automatic discharge
1005659577	15	239000	1	5.3784	GEVB	25	133.2	141.198	63	2.59	19	43	87.3	17.9	27.8	0.79	0.41	10.7	136	22.5	3.43	62	27	30	0	0	0	0	1	0	1	36	23.0104	12	1	3	3	1	0	0	1	0	1	2	0	0	0	1	Better discharge
1006128525	15	4790000	1	6.68034	Ascites	25	296	138.247	66	1.96	540	268	218.7	31.1	23.8	1.85	0.96	2.92	167	22	5.03	137	137	40	0	0	0	0	0	0	1	35	25.6055	20	1	2	3	1	0	0	0	0	3	3	1	1	0	1	Better discharge
1004023486	16	4630	1	3.66558	Infection	28	180.7	82.1114	92	3.07	32	86	130.4	33.6	35.1	1.69	0.72	5.61	445.2	24.7	5.3	91	2	25	1	0	0	0	1	1	1	52	22.1453	22	0	0	0	1	1	1	1	1	3	4	0	0	0	1	Liver transplantation
1004602970	16	2670000	1	6.42651	Ascites	39	252.9	18.0408	313	2.33	1025	795	203.5	28.2	27.6	2.04	1.22	10.83	575.2	20.4	7.1	127	123	34	1	0	0	0	1	1	1	57	29.4118	1	1	2	3	1	1	1	0	1	2	3	0	1	1	2	Automatic discharge
1005782428	16	6480	1	3.81158	Infection	29	312.4	106.119	69	2.7	474	345	235.2	33	28.1	3.16	1.25	3.9	228	23.9	8.72	128	180	29	0	0	0	0	0	0	1	65	25.2595	1.5	1	3	3	1	0	0	0	0	1	2	0	1	0	2	Automatic discharge
1005926075	16	500	0	2.69897	Jaundice	27	499	103.398	73	1.97	778	552	386.1	34.8	24.5	4.84	2.31	3.98	148.8	19.7	6.89	136	393	38	0	0	0	0	1	0	1	59	27.3356	0.5	0	0	0	1	0	0	0	0	2	2	0	2	0	1	Better discharge
1005929859	16	20300000	2	7.3075	Ascites	28	335.3	117.894	57	2.59	132	171	253.4	38.6	27.9	1.42	0.64	3.38	104.5	25	9.8	145	95	29	0	0	0	0	0	0	1	45	20.4152	6	1	2	1	1	0	0	0	1	2	2	0	2	0	2	Death
1006202696	16	375	0	2.57403	Infection	22	160.6	116.686	68	1.92	142	177	132.1	23.8	47.4	2.65	1.32	6.3	151	21.4	9	142	219	40	0	1	0	0	1	0	1	54	20.7612	0.6	0	0	0	1	0	0	0	0	3	3	0	0	0	1	Better discharge
1004128229	17	600	0	2.77815	Infection	22	140.1	114.331	52	1.97	41	45	87.9	27.7	24.1	2.71	1.21	2.31	112.4	30.2	3.4	86	80	40	0	0	0	0	0	0	0	27	16.7657	2	1	2	3	1	0	0	0	1	1	2	0	0	0	1	Automatic discharge
1004167155	17	280000000	2	8.44716	Virus replication	23	155.8	96.9978	83	2.02	2121	1514	110.1	34	31.6	3.3	1.19	4.36	270	25.8	4	147	90	40	0	0	0	0	0	0	1	46	22.4913	5	0	0	0	1	0	0	0	0	3	2	0	0	0	1	Automatic discharge
1004345753	18	348	0	2.54158	Jaundice	31	402.8	122.329	53	3.07	35	46	296.3	29.4	17.6	1.85	1.02	3.84	51.9	21.1	3.8	92	26	25	4	1	0	0	1	1	1	44	20.7612	11	1	1	1	1	1	0	1	1	4	3	1	1	0	3	Automatic discharge
1004576063	19	73800000	2	7.86806	Infection	24	147	112.36	62	2.4	49	88	119.4	23.7	33.2	1.28	0.76	3.39	96.5	21.8	5.44	113	122	33	0	0	0	0	0	0	1	46	20.4152	9	0	0	0	1	0	0	0	0	2	2	0	1	0	1	Better discharge
1005001064	19	500	0	2.69897	Jaundice	29	462	116.249	57	2.38	126	119	345.4	30.9	14.4	2.6	1.31	6.37	146.6	18.6	11.86	107	62	33	0	1	0	0	0	0	1	47	20.7612	21	1	3	3	1	0	1	1	1	1	2	0	0	0	2	Automatic discharge
1005779027	21	8070	1	3.90687	Jaundice	32	346.6	69.3414	101	3.18	236	123	234.9	25.2	26.8	1.58	0.79	4.9	175	27.2	5.03	121	80	25	0	0	0	0	1	1	1	60	24.9135	2	1	2	3	1	0	0	1	1	3	2	0	2	0	2	Automatic discharge
1004412373	21	4690	1	3.67117	Infection	25	304.5	119.307	72	1.9	254	106	206.6	33.5	29.8	2.44	1.36	6.47	137	21.1	4.78	123	114	39	0	0	0	0	0	0	1	41	24.2215	1.5	1	2	1	1	0	0	0	0	2	2	0	0	0	1	Better discharge
1004532414	21	8880	1	3.94841	Ascites	23	215.7	117.621	75	1.91	115	160	166.2	24.4	41.6	2.41	1.16	8.96	268.6	22.1	8.96	109	33	40	0	0	0	0	1	0	1	36	22.4913	4.5	1	2	3	1	0	0	0	1	2	2	0	0	0	1	Better discharge
1005556037	21	76700000	2	7.8848	Infection	24	223.8	137.617	69	1.95	936	294	175.4	32.7	18.6	3.67	1.78	2.14	219.1	26.8	7.15	140	125	40	0	0	0	0	1	0	1	32	29.7578	11	0	0	0	1	0	0	0	0	1	2	1	0	0	1	Better discharge
1005707074	21	500	0	2.69897	GEVB	23	183.8	145.699	44	1.91	21	155	160.6	27.8	18.9	2.31	0.99	4.1	137.7	24.4	3.56	71	106	40	0	0	0	0	0	0	1	22	21.7993	1	1	2	3	1	0	0	0	1	3	3	1	0	0	1	Better discharge
1005712117	21	536000	1	5.72916	Infection	23	187.6	122.093	59	1.93	706	604	143.5	34.9	23	2.93	1.24	3.1	128	26.4	6.37	140	187	39	0	0	0	0	0	0	1	44	25.9516	20	0	0	0	1	0	0	0	0	3	2	1	0	0	1	Better discharge
1003849473	21	66300	1	4.82151	Infection	22	129.6	93.6419	89	2.03	49	124	101.6	18.5	30.5	2.87	1.22	6.21	146.3	22.5	5.12	84	138	38	0	0	0	0	1	1	1	39	29.4118	5	1	2	3	1	0	0	1	0	1	2	0	0	0	1	Better discharge
1005215799	21	5170000	1	6.71349	Ascites	25	312.5	111.998	72	2.02	64	247	244.3	25.9	35.2	2.19	0.94	3.52	120.1	22.9	2.78	111	76	39	0	0	0	0	1	1	1	50	22.1453	30	1	2	3	1	0	0	1	0	2	2	0	1	0	1	Better discharge
1005971252	21	5570000	1	6.74586	Infection	26	226.5	106.957	77	2.32	209	163	170.2	25.5	41.9	2.1	1	5.1	212	22.7	5.18	114	51	34	0	0	0	0	0	0	1	45	20.7612	1	1	2	3	1	0	0	1	0	1	2	0	1	0	1	Automatic discharge
1002945229	21	21700000	2	7.33646	Jaundice	27	372.3	79.9072	98	2.01	189	244	258.6	27.8	24.6	1.67	1.42	5.32	243	26.5	3.76	122	44	39	1	0	0	0	1	1	1	54	30.7958	3	1	2	3	1	1	0	1	0	2	2	1	1	0	1	Automatic discharge
1003646860	21	871000	1	5.94002	Infection	27	220.4	111.451	57	2.59	857	542	135.3	23.5	23.8	1.97	0.87	3.08	128.9	25	7.18	144	131	30	0	0	0	0	0	0	1	52	23.5294	7	0	0	0	1	0	0	0	0	3	2	0	1	0	2	Better discharge
1003945973	21	168000	1	5.22531	Ascites	22	138.6	135.646	64	1.95	628	405	109.1	36.3	23.6	2.85	0.97	2.58	239	33	4.62	138	137	40	0	0	0	0	1	1	1	43	25.9516	18	0	0	0	1	0	0	0	1	4	3	0	0	0	1	Better discharge
1004098609	21	500	0	2.69897	Infection	26	137.1	67.5665	110	2.28	4967	3984	100.9	38.1	25.3	2.35	1.25	9.98	503.7	19.1	5.8	172	139	35	0	0	0	0	0	0	1	49	22.1453	1	1	2	1	1	0	0	0	0	1	2	0	0	0	1	Better discharge
1004392020	21	198000000	2	8.29667	Virus replication	26	202	101.102	87	2.4	1857	827	143.1	28.7	24.7	2.44	1.03	2.07	208.5	22.8	8.39	146	179	33	0	0	0	0	1	1	1	63	30.1038	21	1	2	3	1	0	0	0	0	1	2	1	1	0	1	Automatic discharge
1004709982	21	220000000	2	8.34242	Virus replication	26	282.5	125.299	66	2.15	315	178	205.7	30	21.2	2.29	1.11	3.67	144.7	26.3	5.73	130	110	38	0	0	0	0	0	1	1	27	27.5087	41	1	2	3	1	0	0	0	1	2	2	0	1	0	1	Automatic discharge
1006602472	21	421000	1	5.62428	Infection	24	219.5	105.437	71	1.98	601	219	162.6	37.1	30.8	3.77	2.57	3.07	187.7	24.9	6.13	133	199	40	0	0	0	0	0	0	1	61	24.2215	6	1	2	2	1	0	0	0	0	1	2	1	0	0	1	Better discharge
1003620125	21	575000	1	5.75967	Jaundice	33	343.4	101.987	47	3.87	36	79	232.4	30.8	34.7	0.99	0.35	8.91	278	28.3	4.58	59	127	20	0	0	0	0	0	0	0	62	20.9572	2	1	2	3	1	0	0	0	1	4	3	0	0	0	2	Automatic discharge
1004405147	21	5900000	1	6.77085	Infection	23	176.3	118.011	77	1.98	2391	998	139.8	28.9	25.8	3.38	2.16	2.73	266.7	26	6.11	156	113	39	0	0	0	0	1	1	1	36	23.8754	11	0	0	0	1	0	0	0	0	1	3	0	1	0	1	Automatic discharge
1005940340	21	2780000	1	6.44404	Jaundice	27	411.3	127.967	66	2.22	496	407	291.9	17.1	30	2.47	0.76	5.31	176.2	23.6	5.91	115	147	36	0	0	0	0	1	0	1	46	25.6055	0.5	1	3	3	1	0	0	0	0	2	3	0	3	0	1	Death
1003704984	21	6390000	1	6.8055	Infection	26	284.8	113.014	59	2.21	779	265	200.2	33.3	26.5	2.69	0.97	4.58	141	26.7	8.55	128	178	36	0	0	0	0	1	1	1	49	22.8374	12	0	0	0	1	0	0	0	1	2	3	0	1	0	1	Better discharge
1004135801	21	5380	0	3.73078	Infection	22	177.6	104.302	80	1.86	30	101	144.2	30	35.3	2.48	1.2	4.34	187.9	22.2	2.49	119	41	40	0	0	0	0	1	1	1	42	23.8754	17	0	0	0	1	0	0	1	1	2	3	1	1	0	1	Automatic discharge
1004206783	21	500	0	2.69897	Jaundice	29	632.3	96.7955	60	2.23	67	151	437.8	33.7	31.1	1.38	0.87	3.32	140	26.4	3.39	112	49	36	4	1	1	1	0	0	0	58	29.1495	19	1	2	3	1	1	1	1	1	3	4	1	2	0	3	Death
1004975218	21	500	0	2.69897	Jaundice	29	381.2	129.513	48	2.74	185	128	303.1	22.8	25.8	2.25	1.32	2.94	78	21.6	6.75	109	300	29	0	0	0	0	0	0	0	54	16.7657	1.25	1	2	3	1	0	0	0	0	2	3	0	0	0	2	Automatic discharge
1005238306	22	207000	1	5.31597	Infection	22	179.6	122.107	60	1.89	1017	428	130.8	27.6	27.7	2.53	0.97	1.88	140.9	24.9	6.8	136	197	40	0	0	0	0	1	0	1	49	23.8754	21	1	2	3	1	0	0	0	0	2	3	0	1	0	1	Better discharge
1003772758	23	66500	1	4.82282	Infection	27	205.2	83.233	72	2.71	46	74	120.2	32	33.9	2.26	1.23	7.1	475	32.1	3.74	101	23	28	0	0	0	0	0	0	0	52	18.6709	3	1	3	3	1	0	0	1	0	3	4	1	0	0	2	Better discharge
1004174095	23	100000000	2	8	Virus replication	31	324.8	42.7758	122	2.42	94	520	263.4	33	20.7	3.28	1.35	7.4	491	30.2	2.99	130	139	32	4	1	1	1	1	1	0	56	22.8624	40	1	3	3	1	1	1	0	1	4	4	1	2	0	3	Death
1005009274	23	243000	1	5.38561	Infection	25	308.1	113.401	50	2.04	204	116	220.6	27	40.2	1.83	1.03	1.66	113.3	27.8	5.54	126	65	40	0	0	0	0	0	0	0	29	19.052	10	1	2	3	1	0	0	0	1	2	3	0	1	0	1	Better discharge
1005112116	23	24100	1	4.38202	Infection	28	101.9	44.1025	146	2.52	57	59	72.2	30.1	29.8	2.41	1.11	8.1	338.7	31.2	4.75	99	80	31	0	0	0	0	0	1	1	61	21.4533	1	1	2	3	1	0	0	0	0	1	3	0	0	0	1	Better discharge
1005798839	24	452000	1	5.65514	Infection	26	193	73.1568	103	2.17	202	209	132.2	31.4	29.3	1.29	0.87	5.81	249.5	20.1	4.01	111	54	37	0	0	0	0	0	1	1	64	25.9516	1	1	2	3	1	0	0	1	1	3	3	1	0	0	1	Better discharge
1001261371	25	884000000	2	8.94645	Virus replication	23	111.3	134.191	62	2.26	1470	1196	89.3	26.1	34.2	3	1.85	3.17	273.8	24.1	6.58	152	285	35	2	0	0	1	0	0	1	28	34.6021	20	1	2	1	1	1	0	1	1	2	3	1	1	0	1	Death
1004820681	25	4180000	1	6.62118	Ascites	24	155.3	104.565	78	2.37	339	671	121.2	36.1	36.7	1.61	0.83	5.71	265.5	27	3.93	150	53	34	0	1	0	0	0	0	1	46	24.2215	6	0	0	0	1	0	0	0	1	4	4	1	2	0	1	Automatic discharge
1005122594	25	2070000	1	6.31597	Jaundice	27	371.7	104.743	54	2.24	479	336	294.9	31.7	10.2	2.25	1.03	3.45	215.5	23.3	8.44	140	174	35	1	1	0	0	1	0	1	65	23.3564	1	1	1	2	1	1	1	0	1	4	4	0	2	0	2	Automatic discharge
1003880873	26	7890000	1	6.89708	Infection	40	256.4	145.699	44	7.73	1325	364	160.3	32.4	22.9	2	0.93	1.37	77.2	20.8	9.02	139	131	10	2	1	0	0	1	0	1	30	24.2215	2	0	0	0	1	1	0	0	1	4	4	0	0	0	3	Automatic discharge
1004327462	26	500	0	2.69897	Ascites	24	157.9	149.353	66	2.21	761	360	100.7	30.2	36	2.4	0.99	5.29	224.4	18	8.87	135	264	36	0	0	0	0	1	1	1	24	20.0692	1	1	2	3	1	0	0	0	1	3	3	1	0	0	1	Better discharge
1005269665	26	2410	1	3.38202	Infection	29	196.1	130.154	67	3.17	314	57	80.4	28.8	21	1.78	0.57	6.23	176.4	26.2	7.71	116	102	25	0	0	0	0	1	1	1	45	24.2215	3	1	1	1	1	0	0	0	0	3	4	0	2	0	1	Better discharge
1005755597	26	141000000	2	8.14922	Virus replication	23	164.5	77.4473	96	1.97	390	221	132.1	26.8	33.2	3.88	1.32	6.7	349	24.9	4.94	138	122	40	0	0	0	0	0	0	1	40	31.8339	1	1	2	3	1	0	1	0	0	2	3	1	1	0	1	Better discharge
1003605952	31	100000000	2	8	Virus replication	21	45.5	111.984	63	2.57	477	187	33.5	27.3	28.3	4.79	1.49	4.41	107.6	22.7	11.26	128	219	31	0	1	0	0	1	0	1	54	27.6817	1.5	0	0	0	1	0	0	0	1	3	3	0	0	0	1	Automatic discharge
1003995987	31	72200	1	4.85854	Infection	25	271.6	119.439	36	2.08	468	620	204.1	27.9	47.4	2.8	1.11	2	143.3	24.5	7.88	134	226	38	0	0	0	0	0	0	0	51	19.052	2	1	2	3	1	0	0	1	1	2	3	0	1	0	1	Automatic discharge
1004564172	31	251000	1	5.39967	Ascites	33	264.7	60.7065	107	3.55	1618	1148	172	29	31.2	1.54	0.97	8.93	276.1	14.9	9.01	155	137	22	2	1	0	1	1	1	1	69	28.7197	21	1	2	3	1	1	1	0	1	4	4	0	2	0	3	Death
1004007921	32	965	0	2.98453	Infection	24	260.6	103.692	79	1.93	300	87	201.1	26.6	32.6	2.86	1.66	2.41	82.5	29.4	3.58	115	88	40	0	0	0	0	1	0	1	53	20.7612	22	1	2	3	1	0	0	0	1	1	3	0	1	0	1	Coma
1005446898	32	2110	1	3.32428	Jaundice	26	459.6	129.778	66	1.95	145	122	366.7	24.5	21.8	1.57	0.86	4.99	98.1	21.8	3.76	122	70	39	0	0	0	0	0	0	1	66	23.8754	11	1	2	1	1	0	0	0	0	2	3	0	1	0	1	Better discharge
1005462541	32	500	0	2.69897	Ascites	25	335.9	86.645	88	1.89	19	73	248.6	31.7	40.3	2.18	0.81	5.83	145.8	27.7	8.65	100	110	40	0	0	0	0	0	0	1	52	20.7612	7	1	2	2	1	0	0	1	0	1	3	1	1	0	1	Better discharge
1006041319	31	219000	1	5.34044	Ascites	28	440.4	111.468	69	2.34	193	249	313.3	31.9	23.4	1.31	0.85	6.3	118	27.1	5.78	108	74	33	0	0	0	0	1	1	1	58	24.2215	10	1	2	3	1	0	1	1	1	3	3	0	3	0	1	Automatic discharge
1004750259	31	204000000	2	8.30963	Virus replication	27	406	121.33	55	2.16	762	176	262.6	38	25.4	1.98	0.93	2.38	110	23.2	5.92	141	115	37	0	0	0	0	1	1	1	43	24.2215	1	1	2	3	1	0	0	0	1	4	4	0	2	0	1	Automatic discharge
1004832140	33	424	0	2.62737	Infection	23	206.6	138.846	63	1.92	109	122	165	33	29	3.79	1.62	2.67	291.1	21.4	5.67	124	220	40	0	0	0	0	0	0	1	31	21.7993	5	0	0	0	1	0	0	0	1	3	4	1	0	0	1	Automatic discharge
1004833820	33	184000000	2	8.26482	Virus replication	23	186.2	103.391	82	2	1442	1017	148.5	33.5	26.7	2.59	1.42	4.6	136.5	25.9	5.38	139	78	40	0	0	0	0	1	0	1	39	21.4533	13	0	0	0	1	0	0	0	0	4	4	1	0	0	1	Better discharge
1005119960	33	23500	1	4.37107	Infection	25	195.1	106.107	55	2.36	1444	1078	138.3	30.1	19.1	3.27	2.01	2.2	151.2	24.8	3.22	110	111	33	0	0	0	0	0	0	0	78	19.2425	10	1	1	1	1	0	0	0	0	2	4	0	2	0	1	Better discharge
1005615900	33	39300000	2	7.59439	Infection	23	203.9	128.494	53	1.96	221	157	154.9	26.9	33	2.45	1.26	9.5	115	21.9	14.89	110	134	38	0	0	0	0	0	0	1	61	28.0277	8	1	2	2	1	0	0	1	0	4	4	0	0	0	1	Better discharge
1005641895	33	62000	1	4.79239	Infection	24	236.9	106.799	60	1.97	985	658	183	23.2	29	2.96	1.46	1.83	269.8	24	4.23	129	88	39	0	0	0	0	0	0	1	39	19.3772	21	0	0	0	1	0	0	0	1	2	4	0	0	0	1	Better discharge
1006125638	33	2990	1	3.47567	Ascites	28	291.8	113.158	54	2.75	29	53	232.9	30.7	30.4	1.32	0.84	5.5	72	24.9	2.51	91	34	28	0	0	0	0	1	1	1	54	24.2215	4	1	2	3	1	0	0	1	0	3	4	0	2	0	2	Automatic discharge
1006191409	33	19900	1	4.29885	Jaundice	25	367.3	129.773	50	1.91	292	96	283	29.4	30.2	3.03	1.87	2.19	92.1	26	4.49	134	48	39	0	0	0	0	1	1	1	39	22.1453	0.5	1	2	3	1	0	0	0	0	1	4	1	1	0	1	Better discharge
1002325810	34	500	0	2.69897	Infection	41	151.8	22.0619	221	4.65	56	214	134.4	23.8	25.7	0.35	0.23	32.52	499.5	6.4	14.6	86.5	21.6	17	0	1	0	0	0	0	0	48	33.5315	26	1	2	3	1	0	0	1	0	4	4	0	0	0	3	Automatic discharge
1005778088	34	3350	1	3.52504	Infection	27	186	124.737	61	2.83	243	154	125.6	27.7	32.2	1.51	0.83	2.2	135	21.3	4.96	126	98	28	0	0	0	0	1	0	1	33	24.2215	7	1	2	3	1	0	0	0	0	3	4	0	0	0	1	Better discharge
1005889758	34	7490000	1	6.87448	Infection	20	102.6	85.4362	88	1.89	280	459	72.5	28.7	38.6	2.06	0.98	5.11	291	24.5	4.63	133	125	40	0	0	0	0	1	0	1	33	26.2976	20	1	2	3	1	0	0	0	1	2	4	1	1	0	1	Better discharge
1004236346	35	6200	1	3.79239	Jaundice	31	367	128.344	55	3.1	72	46	272.9	29.5	24.1	1.44	13	2.71	67.3	20.2	7.94	129	106	25	0	0	0	0	0	0	1	35	24.5675	16	1	3	3	1	0	0	0	1	4	4	0	3	0	2	Automatic discharge
1003640446	36	327	0	2.51455	Jaundice	29	476.5	138.648	67	2.55	71	149	374.5	23.5	27.7	2.72	1.53	2.22	67.2	23.7	12.17	109	115	30	0	0	0	0	0	0	1	47	20.7612	11	1	2	3	1	0	0	1	1	3	4	0	5	0	2	Automatic discharge
1004095922	36	500	0	2.69897	HE	28	279.3	126.619	54	2.68	853	731	207.6	38.1	18.6	1.16	0.69	3.73	76.5	25.9	10.38	125	122	29	4	1	0	1	0	1	1	38	20.7612	5	1	2	3	1	1	0	0	1	4	4	1	3	0	3	Coma
1006486047	36	878	0	2.94349	Jaundice	27	653.8	124.417	50	1.87	71	72	475.4	29.6	28.3	2.64	0.98	4.53	100	21.4	7.4	124	112	40	0	0	0	0	1	1	1	48	21.7993	10	1	2	3	1	0	0	0	0	2	4	1	2	0	1	Better discharge
1004447045	37	500	0	2.69897	Ascites	31	602.8	72.4868	105	2.35	64	91	472.5	31.2	20.2	1.04	0.57	8.95	168.4	30.4	4.06	100	26	34	0	0	0	0	1	1	1	47	24.5675	1.5	1	2	3	1	0	1	1	1	4	4	0	2	0	1	Liver transplantation
1004710539	37	45400	1	4.65706	Jaundice	27	382.2	103.504	50	2.13	281	129	248.8	32.1	30.9	1.48	0.76	1.7	65.1	22.2	5.31	122	67	38	0	0	0	0	0	0	0	57	26.6728	11	1	2	3	1	0	0	1	0	4	4	1	2	0	1	Automatic discharge
1005260152	37	500	0	2.69897	Jaundice	37	502.3	36.2512	150	3.12	85	211	358.3	24.7	36.5	1.19	0.86	9.4	240.9	21.8	9.49	108	92	25	0	0	0	0	1	1	0	44	16.0037	1.3	1	2	3	1	0	1	0	1	4	4	0	2	0	2	Automatic discharge
1006124499	37	516000	1	5.71265	Ascites	24	291.4	160.131	28	1.91	414	391	221.8	23.5	51.3	3.36	2.01	3.49	89.9	22.2	7.74	108	108	40	0	0	0	0	1	1	1	43	19.3772	1	1	2	3	1	0	0	1	1	4	4	0	1	0	1	Better discharge
1005065105	38	170000000	2	8.23045	Virus replication	24	120.5	121.281	61	2.4	73	100	92.1	29.8	23.2	2.7	0.74	7.17	99.1	23.3	14.39	96	106	34	0	0	0	0	1	0	1	31	34.6021	21	1	2	3	1	0	0	0	0	1	4	1	0	0	1	Automatic discharge
1006094664	39	65700000	2	7.81757	Jaundice	26	442.1	117.28	53	1.88	511	366	332.6	40.5	28.3	2.63	1.22	4.59	110.3	24	5.96	112	230	40	1	0	0	0	1	1	1	50	25.9516	4	1	2	3	1	1	0	1	1	3	4	1	4	0	1	Better discharge
1001776844	40	345000	1	5.53782	Infection	29	227.1	138.988	62	3.07	73	156	172.1	31.4	47.5	1.52	0.65	3.9	156	22.7	2.58	120	21	25	0	1	0	0	1	1	1	36	25.9516	20	1	3	3	1	0	0	1	0	1	4	1	1	0	3	Automatic discharge
1003353993	40	100000000	2	8	Virus replication	28	123.6	132.015	39	3.48	906	663	105.2	28.4	30.2	1.98	1.1	2.71	87.6	27.4	4.08	108	115	22	0	0	0	0	0	0	1	55	19.7232	2	1	2	2	1	0	0	0	0	1	1	1	0	0	1	Better discharge
1004948952	40	91200	1	4.95999	Ascites	32	338.4	78.6626	97	3.24	1722	1603	241.2	28.4	25.6	1.97	1.14	5.83	168.2	24.6	9.99	120	220	24	0	1	0	1	0	0	1	49	21.4533	41	1	2	3	1	0	1	1	0	3	4	0	4	0	3	Automatic discharge
1004163607	41	163000	1	5.21219	Infection	28	324.8	113.053	61	2.49	527	581	252.8	29.6	41.1	2.26	0.89	3.64	157.3	26.1	3.45	131	79	32	0	0	0	0	0	1	1	47	20.7612	11	1	2	3	1	0	0	0	0	3	4	0	3	0	1	Better discharge
1003354540	42	3660000	1	6.56348	Infection	24	312.8	112.265	56	1.86	734	382	213.9	30.2	25	2.02	0.97	3.04	167.3	24.1	3.74	153	128	40	0	0	0	0	0	0	1	44	24.2215	30	1	2	3	1	0	0	0	0	3	4	0	3	0	1	Better discharge
1004430790	43	100000000	2	8	Virus replication	27	205.8	130.6	37	2.83	624	529	157.6	25.6	28.9	1.91	1.11	0.85	138.5	22.6	5.22	116	66	28	0	0	0	0	0	0	0	38	23.4339	10.5	1	2	3	1	0	0	0	0	3	4	0	1	0	2	Better discharge
1005521640	43	38100	1	4.58092	Infection	26	201	86.3961	102	2.24	237	150	151.9	30.8	20.7	2.04	1.25	8	267	10.5	5.47	141	56	35	1	1	0	0	1	1	0	52	26.6728	11	1	3	3	1	1	0	0	1	4	4	1	1	0	1	Better discharge
1005529252	43	23100000	2	7.36361	Infection	25	320.8	108.875	75	1.92	593	627	234.4	33.9	34.4	1.99	1	2.35	145	23.3	7.65	148	52	40	0	0	0	0	0	0	0	60	28.1969	0.5	1	2	3	1	0	0	1	1	4	4	0	1	0	1	Better discharge
1005920159	43	500	0	2.69897	Infection	26	319.2	111.438	58	2.13	170	160	230.2	33.8	30.8	3.91	1.27	9.27	161.3	26.8	15.66	157	91	37	1	0	0	0	1	0	1	52	25.2595	12	1	2	3	1	1	0	1	1	4	4	0	0	0	1	Automatic discharge
1004454130	44	2290000	1	6.35984	Infection	19	64.6	159.898	20	1.96	344	327	49.2	32.4	41.3	2.29	1.13	4.35	292.1	20.8	3.02	125	127	39	0	0	0	0	0	0	0	38	20.5761	1.5	0	0	0	1	0	0	0	1	4	4	1	2	0	1	Better discharge
1004604446	44	1500	1	3.17609	Ascites	33	416.3	110.696	61	3.67	57	57	272.4	29.7	23.5	2.33	1.31	2.38	83.1	21.1	4.63	111	40	21	1	0	0	0	0	0	1	50	27.6817	21	1	2	3	1	1	0	0	1	4	4	0	4	0	2	Automatic discharge
1005397656	44	10100	1	4.00432	Jaundice	27	384.2	150.719	64	2.1	49	28	295.4	35.4	16.6	3.09	1.66	5.22	158.2	22.8	13.77	128	123	39	0	0	0	0	0	0	1	28	24.9135	11	1	2	1	1	0	0	0	0	3	4	1	1	0	1	Better discharge
1004398349	46	500	0	2.69897	Jaundice	27	401.6	123.343	62	2.21	81	156	281.3	32.3	47.9	2.29	0.88	5.43	203.4	22	9.38	90	260	36	0	0	0	0	0	1	1	62	31.1419	33	1	2	3	1	0	0	1	0	4	4	0	0	0	1	Automatic discharge
1004284189	47	500	0	2.69897	Jaundice	28	542.8	132.184	47	2.21	107	136	381.7	32.1	28.8	2.24	1.01	3.07	67.3	22.8	7.24	157	160	36	2	0	0	0	0	0	1	40	24.3945	31	1	2	2	1	1	0	1	1	4	4	1	2	0	1	Automatic discharge
1004468148	47	4980000	1	6.69723	Ascites	22	70.3	88.0868	92	2.33	63	103	39	26.2	34	2.35	0.92	5.69	187	21.5	4.65	114	45	34	0	0	0	0	0	0	1	42	23.5294	2	1	2	3	1	0	0	0	0	3	4	1	0	0	1	Better discharge
1006569081	47	500	0	2.69897	Jaundice	28	351.9	114.656	56	2.43	187	167	259	26.6	27	1.43	0.57	3.9	106	23.1	5.38	123	111	31	1	0	0	0	0	0	1	50	24.9135	30	1	3	2	1	1	0	0	0	3	4	0	4	0	2	Automatic discharge
1004072709	49	9350	1	3.97081	Ascites	25	135.6	87.2292	86	2.58	228	82	90.3	25.9	24.9	1.84	0.87	4.57	132.5	23.6	11.96	142	83	30	0	1	0	0	0	0	1	55	23.8754	32	1	2	3	1	0	0	1	1	4	4	0	1	0	2	Better discharge
1004030797	51	45100000	2	7.65418	Jaundice	25	397.2	128.869	66	1.87	413	390	304.9	29.1	24.6	2.16	1.32	4.4	159	20.2	4.45	143	58	40	0	0	0	0	0	0	1	45	25.9516	20	1	2	2	1	0	0	1	1	4	4	0	2	0	1	Better discharge
1006557076	51	689000	1	5.83822	Infection	24	142.3	102.77	44	2.36	23	43	102.8	34.2	35.6	3	1.53	2.45	161	21.6	6.71	108	123	33	0	1	0	0	0	0	0	64	21.7192	0.7	1	2	3	1	0	0	1	0	4	4	0	0	0	1	Automatic discharge
1003771394	52	11000	1	4.04139	Infection	27	229.3	151.467	66	2.65	369	124	152.5	29.9	21.7	2.17	1.04	4.02	84.4	24	13.41	136	170	29	1	0	0	0	1	0	1	22	24.9135	12	1	2	3	1	1	0	0	1	4	4	1	2	0	2	Better discharge
1003840866	52	2370	1	3.37475	Infection	32	70.8	107.919	49	1.87	81	126	53.7	29.5	38.3	4.46	2.41	5.2	142	23.8	3.18	93	90	40	0	1	0	1	0	0	0	52	19.052	12	1	2	2	1	0	1	0	1	4	4	0	0	1	3	Automatic discharge
1005072708	53	500	0	2.69897	Infection	27	329.9	128.338	67	2.22	409	424	238.1	32.4	32.8	2.38	1.22	2.74	96.8	27.1	5.3	136	126	36	0	0	0	0	0	1	1	43	26.9896	9	1	2	1	1	0	0	0	0	4	4	1	3	0	1	Automatic discharge
1004119322	54	17800	1	4.25042	Infection	27	132.8	126.842	49	3.15	549	892	97.9	24.5	37.8	2.3	0.77	1.98	143.7	19.5	5.85	129	104	25	0	0	0	0	0	0	1	58	19.3772	10	1	2	3	1	0	0	1	0	4	4	1	0	0	1	Automatic discharge
1005635893	54	2890000	1	6.4609	Ascites	25	298.6	115.371	78	2.07	665	609	203	30.3	32.2	1.88	0.66	3.83	307.5	24.5	6.88	136	83	39	0	0	0	0	1	0	1	32	34.4291	10	1	2	3	1	0	0	1	0	4	4	0	5	0	1	Automatic discharge
1005065029	55	500	0	2.69897	Ascites	29	464.9	72.166	106	2.06	105	139	381.4	32.7	21.9	1.99	0.98	10.26	174.3	22.9	9.04	120	135	40	2	1	0	0	0	1	1	46	22.4913	5	1	1	1	1	1	0	0	1	4	4	0	4	0	2	Automatic discharge
1004173880	56	253000	1	5.40312	Jaundice	28	338.1	106.044	78	2.5	932	265	231	26.3	32.4	1.41	0.85	2.88	136.8	24.3	7.04	142	191	31	0	1	0	0	1	0	1	44	39.4464	1	1	2	3	1	0	0	0	0	4	4	1	2	0	2	Better discharge
1004652602	56	1060000	1	6.02531	Infection	29	256.2	117.054	59	2.98	2353	1068	166.7	39	23.3	1.55	0.82	2.66	139.8	28.8	5.69	106	120	26	1	1	0	0	0	0	1	44	18.3391	21	1	2	2	1	1	0	0	1	4	4	0	2	0	3	Better discharge
1004798433	57	1430	1	3.15534	Jaundice	26	399.1	128.598	52	1.94	101	82	302.1	41.9	24.6	3.86	2.13	4.54	184.7	21.4	7	131	217	40	0	0	0	0	1	1	1	38	24.2215	39	0	0	0	1	0	0	0	0	3	4	0	2	0	1	Better discharge
1003770781	58	243000000	2	8.38561	Virus replication	23	128.7	113.853	64	2.21	51	82	66.9	40.6	38.2	2.93	1.28	4.29	233.6	28	4.92	125	59	35	0	0	0	0	0	0	1	40	23.1834	6	1	3	3	1	0	0	1	1	4	4	0	0	0	1	Better discharge
1004770984	58	151000	1	5.17898	Ascites	26	417.9	107.632	56	2.01	104	82	291	31.2	29.5	1.94	0.94	2.08	73.9	20.8	4.82	137	71	40	0	0	0	0	0	1	1	59	29.7578	1.25	1	2	1	1	0	0	1	0	4	4	0	4	0	1	Automatic discharge
1004962081	58	500	0	2.69897	Jaundice	33	468.4	128.41	54	3.39	38	113	312.3	27.4	24.6	1.12	0.82	2.32	67.6	28	3.47	86	74	23	0	0	0	0	1	0	1	27	20.7612	20	1	2	3	1	0	0	0	1	1	4	0	1	0	2	Automatic discharge
1005595252	58	228000	1	5.35793	Jaundice	30	520.5	121.57	52	2.67	687	401	365.1	32.8	28.6	1.14	0.65	2.76	97.5	27.1	5.17	125	74	29	0	0	0	0	0	1	1	46	23.8754	10	1	2	3	1	0	0	0	1	4	4	1	3	0	2	Automatic discharge
1005092984	59	16400000	2	7.21484	Ascites	24	196.6	122.107	60	2.17	876	653	142.3	34.9	24.3	2.14	1.05	2.57	143.3	26.7	7.51	153	100	37	0	0	0	0	1	1	1	37	19.7232	9	1	2	3	1	0	0	0	0	4	4	0	2	0	1	Better discharge
1005649281	59	983000	1	5.99255	Ascites	25	254.7	126.702	53	2.06	1570	1064	197	37.6	16.7	2.83	1.67	2.3	175	26.1	5.42	141	130	39	0	1	0	0	1	1	1	39	20.0692	6	1	2	3	1	0	0	0	0	4	4	1	5	0	2	Automatic discharge
1006133741	63	3790	0	3.57864	Jaundice	27	561.6	125.616	61	1.87	60	54	425.9	33.9	19.2	1.73	1.47	6.1	141	22.7	10.48	141	121	40	0	0	0	0	0	1	1	32	22.8374	6.5	1	2	3	1	0	1	1	1	4	4	1	3	0	1	Better discharge
1005307686	64	702000	1	5.84634	Infection	24	239.6	142.364	49	1.93	522	324	185.9	24.2	26.8	2.95	2.45	1.74	133.1	23.4	5.91	140	116	40	0	0	0	0	1	1	1	41	26.4706	1	1	2	1	1	0	0	0	0	3	4	1	1	0	1	Better discharge
1003971269	69	701000	1	5.84572	Infection	23	150.5	105.765	70	2.19	1153	623	110.5	33.9	33.3	2.33	0.92	4.69	151.5	25.8	4.5	148	106	36	0	0	0	0	0	1	1	71	24.5675	2	1	2	3	1	0	0	1	0	4	4	0	5	0	1	Automatic discharge
1006526044	71	10700	1	4.02938	Ascites	26	416	112.237	57	1.97	70	100	327.8	38.3	31.9	2.75	1.68	1.9	97	25.6	2.24	112	62	40	0	0	0	0	0	1	1	52	25.9516	0.6	1	2	3	1	0	0	1	1	4	4	0	2	0	1	Better discharge
1004956166	78	500	0	2.69897	Infection	30	326.8	117.095	61	3.04	800	410	226	22.7	32.6	1.82	0.88	2.25	86.5	26.9	7.12	131	176	26	0	0	0	0	0	0	0	67	20.9572	10	1	2	3	1	0	0	1	0	4	4	0	4	0	2	Automatic discharge
1003763333	88	500	0	2.69897	Infection	26	227.8	135.233	68	2.4	2034	1379	169.3	35.8	25.2	2.35	1.23	3.37	139	29.2	7.22	159	103	32	0	0	0	0	0	0	1	33	23.5294	10	1	2	3	1	0	0	0	0	4	4	0	2	0	1	Better discharge
1005519681	93	560000	1	5.74819	Jaundice	37	349.6	37.7849	164	3.19	763	572	258.4	32.3	27.4	1.9	1.07	17.19	287.1	21.3	8.08	135	117	24	0	0	0	0	0	1	1	63	25.2595	30	1	2	3	1	0	0	1	1	4	4	0	1	0	2	Better discharge
1004697513	96	628	0	2.79796	Infection	28	329.4	115.189	72	2.42	50	117	244.5	28.8	33.1	2.49	1.55	3.77	118	21.2	6.18	123	100	34	0	0	0	0	0	0	0	48	20.9572	1	1	2	2	1	0	0	1	0	4	4	0	3	0	1	Automatic discharge
1004155527	101	17400000	2	7.24055	Infection	22	149.8	137.286	63	2	138	66	80.3	35.7	25.5	2.76	0.92	1.93	76.4	23.8	5.25	143	86	40	0	0	0	0	0	0	1	44	24.2215	21	1	2	2	1	0	0	1	1	4	4	0	6	0	1	Better discharge
1003691433	0	2420000	1	6.38382	Ascites	26	264.5	135.776	71	2.21	343	185	196.7	34.3	26.4	2.96	1.84	4.2	251.5	31.2	7.43	136	122	35	0	0	0	0	1	1	1	33	24.9135	12	1	2	2	2	0	0	0	0	0	0	1	1	0	1	Better discharge
1003520530	2	37270000	2	7.57136	Jaundice	36	498	44.368	117	3.64	120	209	353.8	25.5	44.5	1.51	0.83	10.22	222.7	15.9	13.02	91	86	21	0	0	0	0	0	0	1	40	19.5502	4	1	1	3	2	0	1	0	1	1	1	0	0	0	2	Automatic discharge
1004869323	2	605000	1	5.78176	Ascites	35	329.7	39.0892	169	2.69	290	298	251.9	24.9	29.2	2.26	0.93	15.75	379.9	23.3	14.38	104	129	30	0	0	0	0	1	0	1	37	22.4913	1	1	2	3	2	0	0	1	1	1	1	0	0	0	2	Automatic discharge
1005313368	2	1240	0	3.09342	Ascites	34	139.7	33.5332	213	2.73	37	123	106.4	21.2	34.3	1.27	0.64	37.29	739.9	12	10.08	80	26	29	0	0	0	0	0	0	1	35	22.4913	3	1	1	1	2	0	0	1	0	4	1	1	0	0	2	Automatic discharge
1003748195	3	10000	1	4	Jaundice	47	430.7	15.8159	383	3.65	56	92	298.5	22.7	26.2	1.26	0.84	23.19	468.7	23.2	9.37	91	57	21	0	1	0	0	0	0	1	44	22.4913	12	0	0	0	2	0	1	0	1	1	1	0	0	0	3	Automatic discharge
1004074558	4	244000	1	5.38739	Ascites	43	433.5	43.6397	157	5.53	451	226	321.6	30	16.3	1.16	0.52	24.74	268.4	28.9	18.36	138	126	14	2	1	0	1	1	0	1	53	22.8374	2	0	0	0	2	1	1	0	0	4	1	0	0	0	3	Automatic discharge
1001949228	5	588000000	2	8.76938	Virus replication	27	262.6	139.564	69	2.53	148	501	186.1	30.6	38.9	3.2	1.65	3.21	176.8	25.3	3.64	98	36	31	0	0	0	0	0	0	1	49	35.6401	6	1	2	2	2	0	0	1	0	3	4	1	0	0	2	Automatic discharge
1003640933	5	78400000	2	7.89432	HE	31	237.2	52.6548	107	3.17	1136	1795	186.9	24	24.7	1.99	1.04	6.38	322	23.9	7.46	112	121	24	2	0	1	1	1	1	1	45	19.7232	2	1	2	3	2	1	1	0	1	2	1	0	0	0	3	Death
1005014814	6	2220	1	3.34635	Jaundice	37	535.8	50.6333	131	3.28	43	92	345.9	35.8	21	2.55	1.18	7.89	259.2	28.3	9.91	109	40	24	0	1	1	1	1	1	1	60	22.4913	31	0	0	0	2	0	0	0	1	2	1	0	1	0	3	Death
1006181851	6	500	0	2.69897	Ascites	32	547.3	103.151	58	3.08	403	252	373.4	33.8	18.6	1.57	0.98	3.84	66.6	23.1	7.44	110	77	25	1	0	0	0	1	0	1	63	22.1453	20	1	2	3	2	1	1	1	0	1	1	0	0	0	2	Automatic discharge
1004725545	7	98500	1	4.99344	Ascites	27	175.4	119.287	66	2.89	715	299	126.3	27.2	36.2	2.19	1.12	4.29	210.8	21.1	7.66	148	219	27	0	0	0	0	1	0	1	49	22.1453	1.5	1	2	3	2	0	0	0	0	1	1	0	0	0	1	Automatic discharge
1006601697	7	7250000	1	6.86034	Jaundice	33	346.7	45.8257	139	2.62	399	315	262.2	24.9	27.8	1.56	1.32	8.61	356	20.8	6.64	135	41	29	0	1	0	0	1	1	0	54	23.2434	2.5	1	2	3	2	0	1	0	0	2	2	0	0	0	3	Automatic discharge
1002753002	8	500	0	2.69897	Infection	28	236	75.0186	93	2.68	36	97	172.5	29.7	30.2	0.95	0.63	7.35	202.3	25	3.77	92	36	28	0	1	1	1	1	1	0	34	20.1951	32	1	2	3	2	0	0	1	0	2	2	0	0	0	3	Death
1003730833	8	3540000	1	6.549	Jaundice	32	341.7	63.0789	83	3.68	120	249	223	29.9	21.2	1.31	0.76	5.38	227.2	21.3	6.54	124	102	21	0	0	0	0	0	0	1	30	19.3772	3	1	3	3	2	0	0	0	1	1	1	1	0	0	2	Automatic discharge
1003937168	8	2580000	1	6.41162	GEVB	24	230.6	119.989	51	1.97	62	147	185.3	22	31.7	1.81	1.03	7.08	161	22.8	9.64	49	229	39	0	0	0	0	1	1	1	35	22.4913	8	0	0	0	2	0	0	1	1	1	1	0	0	0	1	Automatic discharge
1003719530	9	25500	1	4.40654	Jaundice	38	450.2	27.0271	232	2.39	47	106	345.4	21.6	27.3	1.3	0.83	20.78	558	14.3	12.2	88.2	45.6	33	0	1	0	1	1	1	1	41	22.8374	7	1	2	3	2	0	1	1	1	1	1	0	1	0	3	Automatic discharge
1004570042	10	200	0	2.30103	Ascites	24	184.2	144.509	33	2.16	14	36	73.6	25.4	21.9	2.26	0.85	3.22	79.5	25.8	2.25	81	28	37	1	1	0	0	1	0	1	48	22.8374	4	1	3	3	2	1	0	0	1	2	2	0	0	0	1	Automatic discharge
1004951604	10	7610000	1	6.88138	Ascites	32	278.2	130.978	59	3.89	558	481	177.7	26.6	30.3	1.96	0.87	3.96	167.3	25.3	12.27	141	158	21	0	0	0	0	0	1	1	50	22.8374	4	1	2	3	2	0	0	0	0	2	1	0	1	0	2	Automatic discharge
1005921030	10	1080000	1	6.03342	Jaundice	30	511.7	115.371	78	2.58	438	258	362.8	34.4	13.3	1.91	1.19	3.77	276.4	27.5	4.48	134	69	30	1	1	1	0	0	0	1	32	26.6436	16	1	2	3	2	1	1	0	1	1	1	0	0	0	3	Death
1004986576	11	5870000	1	6.76864	HE	24	206.5	83.069	88	2.13	1435	1861	159.1	22.5	19.2	2.42	1.09	7.12	200.3	25.6	5.88	159	117	39	3	1	0	1	0	0	1	42	22.8374	11	1	3	3	2	1	1	1	1	1	1	0	1	0	3	Automatic discharge
1004988679	11	242000	1	5.38382	HE	32	249.5	130.331	41	3.9	389	491	168.3	32.9	35	1.68	0.84	3.25	131.7	24.3	6.56	139	171	21	2	1	0	0	1	1	1	53	23.1834	2.25	1	2	3	2	1	0	0	0	2	2	0	1	0	3	Automatic discharge
1005579744	11	500	0	2.69897	Jaundice	39	659.6	32.7793	191	2.85	102	185	475.3	34.6	22.7	1.27	0.95	10.7	222	28.6	17.79	105	52	27	1	1	0	0	1	0	1	57	20.0692	1	1	1	1	2	1	1	1	1	3	3	0	1	0	3	Automatic discharge
1003707438	11	945000	1	5.97543	Infection	25	322.5	129.315	54	1.92	375	165	246.2	35	23.1	2.62	0.98	4.41	97.9	23.6	6.79	135	114	40	0	0	0	0	0	0	1	58	25.6055	22	0	0	0	2	0	0	0	0	1	2	1	2	0	1	Better discharge
1004291850	11	68600	1	4.83632	Ascites	33	246.8	23.6076	231	1.92	39	117	206.5	24.5	24.6	5.68	0.67	13.51	591.8	22.9	9.28	118	106	40	0	0	0	0	1	0	1	53	23.1834	32	1	2	3	2	0	0	1	0	1	2	0	0	0	2	Coma
1004679422	11	3860000	1	6.58659	Jaundice	31	466.8	63.1523	117	2.33	178	266	315.9	28	38.3	1.67	0.84	9.06	181.9	16.6	15.76	127	100	35	0	0	0	0	0	0	1	48	23.8754	11.5	1	2	3	2	0	0	1	0	4	3	0	0	0	1	Automatic discharge
1005928912	11	1030000	1	6.01284	HE	24	125	99.6617	67	2.46	109	563	96.8	24.7	30.7	4.83	2.31	10.9	344	25.6	12.2	113	324	31	4	1	0	0	0	0	1	51	23.5294	1	1	2	1	2	1	0	0	1	2	2	0	0	0	2	Automatic discharge
1005953681	12	66100	1	4.8202	Ascites	34	403.3	31.6092	205	1.94	166	77	304.7	31.1	27.8	1.81	0.82	10.83	463.9	16.1	3.98	120	40	40	0	0	1	0	1	1	1	50	29.4118	10	1	2	2	2	0	1	1	0	3	2	0	0	0	3	Death
1003967805	13	4100	1	3.61278	Jaundice	35	530.6	129.825	38	3.86	621	177	396.3	26.1	21.1	1.96	1.14	3.49	58	22.3	6.2	126	73	20	1	0	0	0	1	1	1	63	23.5294	2	0	0	0	2	1	0	0	1	2	2	0	1	0	2	Automatic discharge
1003623174	14	209000000	2	8.32015	Jaundice	31	403.7	123.047	55	3.08	931	957	273.7	39	37.2	1.76	1.27	2.37	52.4	24.7	3.9	147	67	25	4	1	0	1	1	1	1	41	22.4913	12	1	2	3	2	1	0	1	1	2	2	0	1	0	3	Coma
1005616132	14	39100	1	4.59218	Jaundice	31	341.9	101.035	61	3.35	338	285	216.4	24.6	35.2	1.99	1.08	3.4	95	22.7	6.63	118	95	23	2	1	0	1	0	0	1	33	24.2215	30	1	2	3	2	1	1	1	1	3	3	0	2	0	3	Automatic discharge
1005751154	14	500	0	2.69897	Jaundice	41	491.9	79.3551	93	6.71	37	79	295.2	24.7	28.8	1.93	1.01	5.67	138	28.9	6.6	79	75	12	2	1	0	0	0	1	1	42	20.7612	11	1	3	3	2	1	0	1	1	4	3	0	1	0	3	Better discharge
1004299746	15	11900000	2	7.07555	Ascites	33	268.9	30.1936	159	2.66	214	237	199.9	25.9	25.4	1.64	0.76	11.96	368.4	26.8	6.15	106	88	29	0	0	0	0	0	0	1	41	20.0692	1.5	1	2	3	2	0	1	1	1	2	3	1	0	0	2	Coma
1006072383	15	216000	1	5.33445	Ascites	25	239.8	98.8116	54	2.22	40	67	181.9	26.1	29.7	2.37	0.92	2.06	181.5	23.6	5.14	128	74	35	0	0	0	0	0	0	1	38	19.3772	20	1	2	3	2	0	0	1	0	2	2	1	1	0	1	Better discharge
1006203679	15	623000	1	5.79449	Ascites	23	107.2	73.2017	100	2.05	42	93	60.5	28	33.9	2.58	1.05	4.6	231.2	21.5	5.46	109	75	38	0	1	0	0	1	1	1	54	17.301	6	1	2	3	2	0	0	1	0	4	4	1	0	0	1	Automatic discharge
1005297839	16	500	0	2.69897	Jaundice	33	432.2	113.014	59	3.51	61	124	262.9	41.5	32.2	1.63	0.86	4.24	58.6	25.2	5.17	105	89	22	0	0	0	0	1	1	1	49	35.2941	20	1	2	3	2	0	0	0	0	1	2	0	1	0	2	Better discharge
1005676167	16	2800	1	3.44716	Jaundice	26	397.6	120.127	66	1.91	103	83	316.5	31.6	26	1.4	0.67	4.9	130	24.1	4.22	104	64	40	4	0	0	0	1	0	0	44	23.6244	20	1	3	3	2	1	1	1	1	3	2	0	2	0	2	Automatic discharge
1005061857	20	9300000	1	6.96848	Jaundice	27	566.7	101.173	83	1.96	137	154	439.9	35.1	34.7	2.2	1.57	4.54	165.4	25.2	6.03	132	208	39	0	0	0	0	1	1	1	40	21.4533	6	0	0	0	2	0	0	0	0	2	2	1	1	0	1	Automatic discharge
1006601448	21	382	0	2.58206	Jaundice	30	618	120.17	40	2.38	54	135	405.5	37.1	13.7	2.13	0.91	4.61	128.7	23.1	5.21	78	103	32	4	1	0	0	1	1	1	63	21.7993	2	1	3	3	2	1	1	1	1	4	4	0	0	0	3	Coma
1004371180	21	459000	1	5.66181	Jaundice	29	370.3	110.671	57	2.76	1182	666	251.6	30.7	21.1	1.98	0.92	3.74	113.8	21.2	8.96	134	81	28	3	1	0	0	1	0	1	54	26.6436	26	1	3	3	2	1	1	1	1	3	3	0	1	0	3	Automatic discharge
1005886125	21	500	0	2.69897	Ascites	25	293.9	95.4389	78	2	32	103	234.7	24.7	49.9	1.75	0.76	3	262	20.2	5.75	101	117	40	2	1	0	0	1	1	1	59	21.9723	30	1	3	3	2	1	1	0	1	3	4	0	0	0	2	Automatic discharge
1002614430	21	4520000	1	6.65514	Ascites	25	174	98.9052	60	2.42	631	799	127.9	24.1	26.2	2.74	1.01	4.52	125.9	25.2	4	121	62	32	0	0	0	0	0	1	1	51	26.2976	0.5	1	2	3	2	0	0	1	1	2	4	1	1	0	1	Better discharge
1004078244	21	34300	1	4.53529	Infection	29	285.8	125.712	77	2.81	823	224	196.3	32.3	25.3	1.44	1.08	4.11	138.5	27.1	12.36	141	186	27	0	0	0	0	0	0	1	37	26.2976	22	1	2	2	2	0	0	0	0	2	4	1	1	0	2	Automatic discharge
1004085048	21	676000	1	5.82995	Ascites	29	224.1	94.8271	55	3.15	211	571	156.8	26.7	30.8	1.51	0.59	4.03	141.8	22	5.62	103	144	24	0	1	0	1	0	0	0	65	17.1468	7	1	2	3	2	0	0	1	1	4	4	0	2	0	3	Automatic discharge
1004741731	21	1340000	1	6.1271	Jaundice	35	762.2	107.544	78	3.52	61	178	516.9	29.2	10.6	1.4	0.54	7.25	148.4	24.6	4.48	88	70	22	0	0	0	0	0	0	1	44	25.9516	7	1	2	3	2	0	0	1	1	1	3	1	3	0	2	Automatic discharge
1005347671	22	576000	1	5.76042	Ascites	25	173.3	111.163	52	2.46	91	180	115.8	31.5	25.9	2.5	1.24	2.19	131.7	24.7	4.05	110	68	32	0	0	0	0	0	0	0	45	20.5761	3	1	2	3	2	0	0	1	0	2	3	1	0	0	1	Better discharge
1005602916	22	156000	1	5.19312	Jaundice	27	465.4	110.184	52	2.14	87	129	366	36.8	14.3	2.18	1.08	2.58	62.1	25.3	2.18	96	27	37	4	1	1	1	1	0	1	60	22.1453	30	0	0	0	2	1	0	1	1	3	4	0	0	0	3	Death
1005853233	22	1210000	1	6.08279	Ascites	24	139.6	108.083	52	2.36	1130	995	95.4	31.3	36.6	3.09	0.75	2.4	147	27.3	4.69	125	102	33	1	1	0	0	0	0	0	49	28.1969	20	1	2	3	2	1	0	0	1	3	3	0	1	0	1	Automatic discharge
1005997025	22	971	0	2.98722	Jaundice	28	422.6	114.031	53	2.3	128	163	315.9	31.3	15.4	2.09	1.01	3.17	83.7	23.3	8.85	132	51	34	3	1	0	0	0	0	1	54	23.5294	6	1	2	3	2	1	0	1	1	4	2	0	2	0	3	Automatic discharge
1006081343	22	203000000	2	8.3075	Virus replication	23	150.1	114.644	69	2.08	829	541	106.4	30.5	30.1	3.52	2.03	5.19	235.4	27	5.56	140	120	37	0	0	0	1	0	1	1	54	22.4913	0.6	1	3	3	2	0	1	0	1	4	4	1	1	0	1	Automatic discharge
1005128699	23	5310000	1	6.72509	Infection	26	318.3	109.924	56	2.08	752	930	245.4	30.3	33.1	2.08	1.25	3.3	231.8	24.4	4.83	150	82	38	0	0	0	0	0	0	1	47	26.6436	1	1	2	2	2	0	0	1	1	3	4	1	1	0	1	Better discharge
1005633437	23	8140	1	3.91062	Ascites	26	243.5	117.315	65	2.4	535	536	170.3	29.9	24.6	1.78	0.73	3.49	200.6	20.1	3.64	125	73	33	0	1	0	0	1	0	1	61	23.8754	13	1	2	2	2	0	1	0	1	3	3	0	2	0	2	Automatic discharge
1004473650	24	26200	1	4.4183	Infection	24	269	118.811	71	1.91	756	454	213	26.6	26.9	2.75	2.5	4.25	225.2	19.3	8.51	157	179	40	0	0	0	0	1	1	1	44	24.2215	1	0	0	0	2	0	0	0	0	1	3	1	0	0	1	Better discharge
1005362449	24	13500	1	4.13033	Jaundice	33	422.9	127.457	71	3.67	211	73	265.4	33.7	17.4	2.15	0.84	5.72	153.7	20.9	12.61	146	127	21	1	1	0	0	1	1	1	34	26.6436	21	1	2	2	2	1	0	0	0	4	4	1	2	0	3	Automatic discharge
1002831304	26	88700000	2	7.94792	Ascites	23	74.3	136.197	70	2.7	421	362	53.9	34	22.8	1.75	0.82	2.7	152	24.3	1.25	157	35	30	1	0	0	0	0	0	1	29	27.6817	13	1	3	3	2	1	1	1	1	2	3	0	3	0	1	Better discharge
1005891142	31	500	0	2.69897	Jaundice	30	666.4	73.2882	109	2.06	97	187	478.4	33.5	41.1	1.58	0.86	8.55	271.9	24.8	5.69	90	98	39	0	0	0	0	1	0	1	47	21.1073	0.9	1	3	2	2	0	0	0	1	4	4	0	1	0	1	Automatic discharge
1005982535	31	6.91	0	0.839478	Jaundice	25	355.5	93.1442	44	1.93	354	579	280.6	22.4	23.9	2.07	1.48	2.34	133	23.7	3.67	109	82	40	0	0	0	0	0	0	1	35	16.955	1.4	1	2	3	2	0	0	1	1	2	3	0	0	0	1	Better discharge
1006016592	31	826000	1	5.91698	Ascites	37	288.9	61.0565	129	4.23	51	104	192.2	29.9	23.8	0.56	0.6	21.8	397	20.4	6.9	102	67	18	0	1	0	0	0	0	1	42	24.9135	11	1	2	3	2	0	0	1	1	4	4	0	0	0	3	Automatic discharge
1005808551	32	241	0	2.38202	Jaundice	36	522.9	67.313	119	3.47	80	190	376.8	28.1	25	1.28	0.53	6.91	168.5	27.3	4.55	78	43	22	2	1	0	0	1	1	1	36	25.2595	20	1	2	3	2	1	0	1	1	4	4	0	0	0	3	Automatic discharge
1003886042	31	850	0	2.92942	Jaundice	42	526.1	15.6653	302	2.57	47	139	400.1	31.6	30.3	1.2	1	14.03	448.9	33.5	7.38	105	104	30	1	0	0	0	0	1	0	43	32.3884	18	1	2	3	2	1	1	1	1	1	3	0	3	0	3	Automatic discharge
1005869451	31	68300000	2	7.83442	Jaundice	25	340	145.222	63	2	996	570	256.7	29.1	22.8	2.18	0.76	2.2	119	26.9	6.5	131	171	39	0	0	0	0	0	1	1	26	31.1419	20	1	2	1	2	0	0	0	0	1	3	1	0	0	1	Better discharge
1004898185	31	57800	1	4.76193	Ascites	33	259.1	116.111	45	4.23	44	153	177	26.1	34.4	1.34	0.55	3.4	207.1	21.5	5.23	103	83	19	1	1	0	0	1	1	1	40	24.9135	1	1	2	3	2	1	0	1	1	4	4	0	2	0	3	Better discharge
1005127579	32	16900	1	4.22789	Ascites	20	85.2	129.784	63	1.98	36	49	25	27.7	33.1	2.64	1.04	5.29	246.3	27.9	2.07	36.3	33	40	0	1	0	0	0	0	1	52	24.2215	6	1	2	3	2	0	0	1	0	4	4	0	0	0	1	Automatic discharge
1005313827	33	790000	1	5.89763	Infection	25	326.1	130.048	64	1.88	446	454	231.5	28.8	26.4	4.45	1.87	4.86	97.7	22.4	8.18	131	150	40	0	0	0	0	0	0	1	45	24.2215	6	1	2	3	2	0	0	0	0	2	4	0	2	0	1	Better discharge
1004311406	34	11800000	2	7.07188	Infection	26	312.9	150.413	63	2.22	1058	695	242.7	30.7	25.1	3.72	2.02	2.63	101.9	29.6	11.53	135	116	36	0	0	0	0	1	0	1	31	33.564	2	1	2	2	2	0	0	0	1	3	4	1	0	0	1	Better discharge
1006520754	34	61200	1	4.78675	Ascites	24	269.9	94.8451	61	1.84	232	130	175.8	35.3	28.3	1.91	0.84	5.43	118.7	22.2	6.54	116	150	40	0	0	0	0	0	1	1	72	19.0311	0.6	0	0	0	2	0	0	0	1	2	4	0	0	0	1	Automatic discharge
1003747244	35	500	0	2.69897	Ascites	24	212.9	99.6024	60	2.01	69	98	156	29.5	32.9	2.03	1	3.72	142.9	30.7	3.2	100	48	40	1	1	0	0	0	0	1	66	21.4533	13	1	2	3	2	1	1	1	1	4	4	0	2	0	2	Automatic discharge
1005087452	35	500	0	2.69897	Ascites	25	294.6	101.798	71	1.95	154	105	227.9	22.7	31.2	2.49	1.02	6.17	111.4	21.5	7.48	122	176	40	1	0	0	0	0	0	0	36	21.3382	19	0	0	0	2	1	0	0	1	4	4	0	4	0	1	Better discharge
1003783112	36	10200000	2	7.0086	Ascites	30	327.5	119.562	57	2.95	768	637	227.6	34.3	22.5	2.18	1.43	2.08	181.5	24.3	7.5	130	130	26	1	0	0	0	1	1	1	43	24.5675	21	0	0	0	2	1	0	0	1	3	4	0	2	0	2	Better discharge
1005911949	36	919000	1	5.96332	Jaundice	27	435.4	136.525	36	2.07	110	119	332.4	32.1	24.4	2.2	0.65	4.36	88	23.2	3.27	137	41	38	0	0	0	0	1	1	1	51	21.7993	5	1	3	3	2	0	0	1	1	4	4	1	4	0	1	Automatic discharge
1004072957	37	991	0	2.99607	Jaundice	32	424.5	82.8639	94	3.26	67	121	289.9	28.8	31.4	1.82	1.07	6.15	189.6	30.2	5.85	126	56	24	0	0	0	0	0	0	1	47	26.2976	22	1	2	3	2	0	0	1	1	2	4	0	3	0	2	Automatic discharge
1002617144	38	5630	1	3.75051	Ascites	35	707.1	129.151	59	3.63	96	85	445.5	38.8	16.9	1.58	0.74	4.06	95.8	24.7	8.38	100	147	21	2	0	0	0	1	1	1	30	15.5709	10	1	2	3	2	1	0	0	1	4	4	0	0	0	2	Better discharge
1004640960	38	3660000	1	6.56348	Ascites	40	267.3	16.044	353	2.38	219	65	199.9	27	34.6	1.44	0.67	15.28	502.1	18.7	11.61	106	176	33	0	1	0	0	1	1	1	46	24.5675	6.5	1	2	3	2	0	1	0	1	3	4	0	2	0	2	Coma
1004595541	39	633000000	2	8.8014	Virus replication	25	125.5	125.572	59	2.71	329	129	53.1	34.6	34.2	3.51	1.23	6.22	180.7	25.8	6.24	144	139	29	1	0	0	0	0	0	1	35	39.7924	2.5	0	0	0	2	1	0	0	1	4	4	1	4	0	1	Automatic discharge
1005362467	39	704000	1	5.84757	Jaundice	30	420.8	112.237	57	2.9	59	79	285.8	23.5	32.2	0.95	0.76	5.26	95.3	21.5	4.18	77	21	27	0	1	0	0	0	0	1	45	24.9135	0.8	1	2	3	2	0	0	1	0	4	4	0	2	0	3	Automatic discharge
1004652671	48	23300	1	4.36736	Jaundice	39	404.3	45.392	162	3.63	27	61	300.8	26.1	30.6	1.09	0.75	16.42	301.9	25.1	5.68	100	30	22	0	1	0	0	1	1	1	39	23.1834	31	1	3	3	2	0	1	1	1	4	4	0	1	0	3	Automatic discharge
1006033430	48	61200	1	4.78675	Infection	28	319	117.376	46	2.6	515	769	246.8	31.3	25	1.79	0.83	2.15	126.3	26.3	10.54	117	186	29	0	0	0	0	0	0	0	43	20.9572	20	1	3	3	2	0	0	0	1	4	4	0	1	0	2	Automatic discharge
1004137071	49	1540000	1	6.18752	Jaundice	29	653.4	142.364	49	2.26	114	97	464.8	28.9	24.4	2.99	1.28	3.76	35	21.5	10.41	88	117	35	4	1	1	1	1	1	1	27	19.3772	12	1	2	3	2	1	1	1	1	4	4	1	4	0	3	Death
1003625279	51	13700000	2	7.13672	Infection	28	315.6	144.016	43	2.62	326	332	208.4	29.6	20.3	1.99	0.86	1.32	96	24.5	3.32	145	80	30	0	1	0	0	1	1	0	53	28.1969	2	1	2	3	2	0	0	0	1	4	4	0	3	0	3	Better discharge
1003742717	51	386000	1	5.58659	Ascites	24	172.3	110.67	60	2.15	15	40	100.5	36.5	30.6	2.93	1.29	2.15	205.9	27	4.28	66	98	37	0	0	0	0	1	1	1	51	23.0104	9	1	2	3	2	0	0	0	0	4	4	0	0	0	1	Better discharge
1004217240	55	205000000	2	8.31175	Virus replication	28	413.2	99.1302	73	2.27	73	43	257.7	36.2	22.8	2.46	1	6.03	156.4	26.1	3.41	131	33	35	1	1	0	0	1	1	1	65	21.7993	1.5	1	2	1	2	1	0	1	1	4	4	0	3	0	2	Automatic discharge
1006500743	58	51700	1	4.71349	Ascites	26	223.2	135.079	52	2.4	2038	1353	158.5	29.3	27.7	2.26	1.45	1.9	143.9	25.8	6.16	146	134	32	0	0	0	0	1	1	1	46	24.5675	10	1	2	3	2	0	0	0	0	4	4	0	3	0	1	Better discharge
1005392657	65	341000	1	5.53275	Infection	24	228.9	134.806	67	1.95	531	393	182.3	28.6	30.7	2.73	1.64	3.16	112	25.1	4.19	153	116	40	0	1	0	0	0	1	1	52	43.2526	1	1	2	3	2	0	0	0	0	3	4	1	3	0	2	Automatic discharge
1002723369	69	10700	1	4.02938	Jaundice	27	571.2	123.29	52	1.96	105	132	392.5	28.5	36.1	1.52	1.3	4.8	93.3	24.9	10.11	127	117	40	0	0	0	0	0	1	1	55	24.9135	20	1	2	3	2	0	0	0	1	4	4	0	3	0	1	Automatic discharge
1005534554	86	347	0	2.54033	Jaundice	27	390.3	138.837	41	2.2	72	58	262.3	30.1	29.8	2.09	1.03	3.86	105.1	21.6	5.31	135	68	36	0	0	0	0	1	1	1	64	21.1073	0.5	1	2	3	2	0	0	1	0	4	4	0	1	0	1	Better discharge
1004161126	2	713000	1	5.85309	Ascites	42	331.2	37.6088	186	4.61	26	42	266.7	27.8	26.2	1.56	0.78	23.37	205.1	19.1	33.55	127	75	19	0	1	0	0	0	0	1	37	22.8374	17	0	0	0	3	0	1	1	1	3	1	0	0	0	3	Automatic discharge
1004462036	3	884700	1	5.9468	Jaundice	34	386.3	51.4648	130	2.99	973	834	288.3	29.8	33.7	2.29	1.43	6.61	300.1	24.3	9.36	146	177	26	0	0	0	0	0	0	0	53	22.2908	1.5	0	0	0	3	0	1	0	0	1	1	0	0	0	2	Automatic discharge
1271906	13	3420000	1	6.53403	Infection	20	82.9	100.256	60	1.97	1715	1718	65.4	28.6	36.9	3.58	1.91	3.93	394.4	23.8	4.23	145	168	40	0	0	1	0	0	0	1	40	19.3772	8	1	2	2	3	0	0	0	0	1	2	1	0	0	1	Death
1003806084	14	910000	1	5.95904	Jaundice	30	444	66.1575	110	2.26	96	119	319	30.8	31.2	1.68	1.53	6.6	240.1	27.3	11.38	131	67	35	0	0	0	0	1	0	1	28	23.5294	2	1	2	3	3	0	0	1	1	3	2	0	1	0	1	Better discharge
1005297839	25	500	0	2.69897	Ascites	30	249	111.476	61	3.35	24	74	168.1	26.8	24	1.59	1.03	3.16	150	24.3	4.57	78	62	23	0	0	0	0	1	1	1	34	20.4152	20	1	1	1	3	0	1	1	0	1	3	0	1	0	2	Automatic discharge
1005083205	32	4840000	1	6.68485	Ascites	26	154.2	69.5677	84	2.67	1277	1026	107	28.8	33.7	2.75	0.97	5.84	169.5	23	5.63	140	124	29	0	0	0	0	0	0	0	41	19.433	30	1	2	3	3	0	0	0	1	4	4	1	1	0	1	Automatic discharge
1004972541	37	2890000	1	6.4609	Ascites	26	172	118.811	71	2.64	552	460	120.8	29.4	30.5	2.3	1.02	3.02	195.1	26.7	4.08	145	110	30	0	0	0	0	1	1	1	36	24.5675	21	1	2	3	3	0	0	0	0	4	4	0	2	0	1	Coma
1002977719	38	500	0	2.69897	Jaundice	30	446.4	92.9288	87	2.63	79	110	341	30.3	34.6	2.22	0.99	6.4	200	26.8	11.72	119	209	30	0	0	0	0	0	0	1	59	21.1073	3	1	3	3	3	0	0	1	0	4	4	0	4	0	2	Automatic discharge
1005740290	39	500	0	2.69897	Ascites	33	270	105.089	52	4.17	22	45	185	29.9	31.6	2.31	1.12	2.5	114	21	3.95	102	46	19	0	1	1	1	0	0	1	50	18.8581	21	1	2	3	3	0	0	1	1	4	4	1	3	0	3	Death
1005714787	52	145000	1	5.16137	Ascites	26	297.3	125.815	53	2.11	271	261	197.4	26.8	31.6	1.65	0.84	4.5	86	22.6	9.83	147	102	38	1	1	0	0	1	1	1	56	26.9896	21	1	2	3	3	1	0	1	1	4	4	1	4	0	2	Automatic discharge
1005529405	62	192000	1	5.2833	Jaundice	27	374.8	126.06	68	2.31	476	244	278	30.4	30.3	1.97	1.09	1.6	88	21.2	2.73	129	53	34	0	1	0	0	1	1	1	53	24.9135	20	1	2	3	3	0	0	1	1	4	4	0	5	0	2	Automatic discharge
1006503464	68	1890000	1	6.27646	Jaundice	33	417.8	56.3083	142	2.51	293	146	260.9	32.9	29.3	2.16	1.07	7.4	208	21.3	7.25	136	74	30	0	0	0	0	0	0	1	27	26.6436	10	1	3	3	3	0	0	0	0	4	4	1	2	0	2	Better discharge
1005811911	72	161000000	2	8.20683	Virus replication	25	175.6	103.164	57	2.3	268	198	115.2	34.5	25.3	2.47	1.16	5.67	182	25.5	5.7	142	79	33	0	0	0	0	0	0	1	32	29.4118	20	1	2	1	3	0	0	1	1	4	4	0	4	0	1	Better discharge
2001125104	87	500	0	2.69897	HE	27	332.8	103.701	53	2.34	74	91	244.7	23	22.4	2.65	1.23	3.47	93	18.9	4	95	73	34	4	1	1	1	0	0	1	45	17.6471	11	1	2	3	3	1	1	0	1	4	4	0	1	0	3	Death
1004843197	100	2030	1	3.3075	Ascites	30	577.6	145.518	64	2.45	1292	402	321.6	34.2	23.6	1.42	1.04	3.01	91	24	10.19	147	157	32	0	0	0	0	0	0	1	57	24.9135	1	1	3	1	3	0	0	1	1	4	4	0	6	0	1	Automatic discharge
1004056658	133	44.6	0	1.64933	Jaundice	30	351.4	103.15	74	3.03	211	83	265.7	25.5	32.7	1.56	1.32	2.58	136.7	23.9	7.93	125	158	26	4	1	1	1	1	1	0	49	21.3382	18	1	2	3	3	1	1	0	1	4	4	0	5	0	3	Death
1005713632	48	1390000	1	6.14301	Ascites	28	206.3	116.549	47	3.01	503	958	136.5	29.5	31.6	1.06	0.35	1.6	140	18.1	4.63	83	97	26	0	0	0	0	0	0	1	49	19.5502	16	1	3	3	4	0	0	1	1	4	4	1	4	0	2	Automatic discharge
1003839233	53	512000	1	5.70927	Jaundice	26	357.2	139.597	48	2.08	659	450	254.7	28.2	37.3	2.97	1.74	1.98	90.9	23.4	7.6	154	256	38	0	0	0	0	0	0	1	45	26.6436	12	1	2	3	4	0	0	0	1	4	4	1	1	0	1	Automatic discharge
[truncated: 2 more columns]
